# Supplementary material for: Meta-analysis of genetic variants associated with human exceptional longevity
Source: Aging (Albany NY). 2013 Aug 24;5(9):653–61. doi: 10.18632/aging.100594 (PMC3808698; doi:10.18632/aging.100594)
Supplement: Supplementary file 1 [file aging-05-653-s001.xlsx]

## Sheet: suppl.table.1
Significant.05	Significant.06	Index	SNP	Gene	Alleles	A.AF	CA.a	NECS.OR.a	SICS.OR.a	ELIX.OR.a	LLFS.OR.a	MetaOR.a	Pval.add	FDR.05.a	Sign.a.05	FDR.06.a	Sign.a.06	CA.d	NECS.OR.d	SICS.OR.d	ELIX.OR.d	LLFS.OR.d	MetaOR.d	Pval.dom	FDR.05.d	Sign.d	FDR.06.d	Sign.d.06	CA.r	NECS.OR.r	SICS.OR.r	ELIX.OR.r	LLFS.OR.r	MetaOR.r	Pval.rec	FDR.05.r	Sign.r.05	FDR.06.r	Sign.r.06
1	1	1	rs2075650	TOMM40/APOE	A/G	0.925	G	0.492	0.726	0.499	0.507	0.527(0.452;0.616)	4.44089e-16	0.000178571	yes	0.000214286	yes	GG	0.133	1.616	0.291	0.333	0.408(0.203;0.817)	0.0114332	0.0128571	yes	0.0154286	yes	AG/GG	0.495	0.648	0.483	0.493	0.514(0.435;0.607)	4.66294e-15	0.000178571	yes	0.000214286	yes
0	0	2	rs1322048	TEK	A/G	0.367	G	0.79	1.067	0.85	1.101	0.918(0.839;1.005)	0.0653618	0.0242857	no	0.0291429	no	GG	0.876	1.017	0.843	1.094	0.944(0.834;1.068)	0.359163	0.035	no	0.042	no	AG/GG	0.485	1.263	0.772	1.242	0.868(0.526;1.43)	0.577396	0.0405357	no	0.0486429	no
0	1	3	rs12629971	EIF4E3	A/G	0.118	G	1.592	0.847	1.176	0.868	1.089(0.782;1.516)	0.613671	0.0455357	no	0.0546429	no	GG	1.644	0.848	1.243	0.872	1.183(1.03;1.358)	0.0174528	0.0146429	no	0.0175714	yes	AG/GG	2.077	0.677	0.943	0.706	1.154(0.775;1.717)	0.480962	0.0382143	no	0.0458571	no
1	1	4	rs1456669	NA	A/C	0.16	C	0.638	0.835	1.118	0.817	0.777(0.685;0.882)	9.89027e-05	0.00160714	yes	0.00192857	yes	CC	0.594	0.82	1.1	0.775	0.74(0.642;0.853)	3.39908e-05	0.000535714	yes	0.000642857	yes	AC/CC	0.683	0.801	1.397	1.07	0.875(0.574;1.333)	0.533775	0.0396429	no	0.0475714	no
1	1	5	rs6801173	EIF4E3	A/G	0.138	G	1.509	0.928	1.202	0.906	1.173(1.044;1.318)	0.00723461	0.00839286	yes	0.0100714	yes	GG	1.574	0.934	1.267	0.904	1.205(1.053;1.377)	0.00648556	0.00982143	yes	0.0117857	yes	AG/GG	1.79	0.801	1.064	0.81	1.197(0.838;1.711)	0.323681	0.0332143	no	0.0398571	no
0	0	6	rs337656	NA	A/G	0.812	G	0.768	0.92	1.023	1.15	0.906(0.815;1.008)	0.0687833	0.025	no	0.03	no	GG	0.345	0.797	1.061	1.452	0.704(0.516;0.96)	0.0264159	0.0171429	no	0.0205714	no	AG/GG	0.822	0.925	1.02	1.133	0.931(0.821;1.056)	0.265538	0.0316071	no	0.0379286	no
0	0	7	rs997675	NA	A/G	0.411	G	0.804	1.082	0.919	1.152	0.948(0.868;1.036)	0.238081	0.03625	no	0.0435	no	GG	0.89	1.105	0.995	1.161	1.003(0.883;1.139)	0.963552	0.0491071	no	0.0589286	no	AG/GG	0.548	1.119	0.766	1.298	0.822(0.695;0.973)	0.0225902	0.0119643	no	0.0143571	no
0	0	8	rs2247549	NA	A/G	0.054	G	1.653	0.916	0.71	0.89	1.104(0.933;1.306)	0.248888	0.0366071	no	0.0439286	no	GG	1.818	0.95	0.704	0.906	1.162(0.97;1.392)	0.102498	0.0246429	no	0.0295714	no	AG/GG	0.622	0.615	0.556	0.587	0.6(0.313;1.15)	0.124017	0.0251786	no	0.0302143	no
1	1	9	rs9899404	GIP	A/G	0.473	G	0.77	1.127	0.864	0.804	0.864(0.792;0.942)	0.000997949	0.00357143	yes	0.00428571	yes	GG	0.625	1.288	0.666	0.802	0.779(0.681;0.891)	0.000274628	0.00267857	yes	0.00321429	yes	AG/GG	0.826	1.06	1.114	0.669	0.886(0.759;1.035)	0.127674	0.0258929	no	0.0310714	no
0	0	10	rs1340573	NA	A/G	0.902	G	0.85	0.939	1.146	1.218	0.98(0.861;1.114)	0.754298	0.0471429	no	0.0565714	no	GG	0.139	0.895	1.58	1.473	0.825(0.528;1.29)	0.399347	0.0364286	no	0.0437143	no	AG/GG	0.947	0.937	1.125	1.24	1.016(0.878;1.175)	0.835896	0.0457143	no	0.0548571	no
1	1	11	rs4977756	NA	A/G	0.552	G	1.367	1.126	1.039	0.977	1.173(1.073;1.282)	0.00045539	0.00267857	yes	0.00321429	yes	GG	1.642	1.253	1.048	0.937	1.29(1.087;1.53)	0.00348772	0.00767857	yes	0.00921429	yes	AG/GG	1.426	1.135	1.051	0.99	1.195(1.053;1.355)	0.00573861	0.00535714	no	0.00642857	yes
0	1	12	rs4073968	NA	A/G	0.305	G	0.727	0.972	1.066	1.03	0.88(0.797;0.972)	0.0114549	0.0108929	no	0.0130714	yes	GG	0.651	0.957	1.092	1.039	0.843(0.745;0.954)	0.00692122	0.0101786	yes	0.0122143	yes	AG/GG	0.738	1.021	1.05	1.048	0.9(0.708;1.145)	0.392876	0.0360714	no	0.0432857	no
0	0	13	rs147295	ELL2	A/G	0.292	G	1.157	0.855	0.979	0.982	1.016(0.925;1.116)	0.743378	0.0469643	no	0.0563571	no	GG	1.014	0.786	1.053	1.006	0.961(0.85;1.086)	0.522528	0.0403571	no	0.0484286	no	AG/GG	2.098	0.887	0.777	0.875	1.193(0.963;1.477)	0.105877	0.0235714	no	0.0282857	no
0	1	14	rs4802234	CEACAM16	A/C	0.402	C	1.359	0.978	1.211	0.851	1.122(1.029;1.224)	0.00935227	0.00928571	no	0.0111429	yes	CC	1.553	0.887	1.106	0.75	1.123(0.983;1.284)	0.0887097	0.0233929	no	0.0280714	no	AC/CC	1.458	1.077	1.588	0.891	1.234(1.056;1.442)	0.00805739	0.00767857	no	0.00921429	yes
0	1	15	rs8083511	TNFRSF11A	A/C	0.83	C	0.864	0.918	1.108	1.176	0.97(0.87;1.082)	0.582204	0.0446429	no	0.0535714	no	CC	0.323	0.756	0.892	0.87	0.622(0.451;0.858)	0.00382851	0.00821429	yes	0.00985714	yes	AC/CC	0.97	0.932	1.184	1.287	1.046(0.92;1.19)	0.490559	0.0383929	no	0.0460714	no
1	1	16	rs4871976	PHYHIP	A/G	0.72	G	1.216	1.168	1.194	1.029	1.164(1.052;1.287)	0.0033062	0.00660714	yes	0.00792857	yes	GG	2.277	1.639	1.17	1.014	1.636(1.26;2.125)	0.000223109	0.00214286	yes	0.00257143	yes	AG/GG	1.106	1.125	1.265	1.043	1.119(0.988;1.267)	0.0765938	0.0192857	no	0.0231429	no
0	1	17	rs651922	DCPS	A/G	0.724	G	1.185	0.955	1.417	1.065	1.137(1.029;1.256)	0.011746	0.01125	no	0.0135	yes	GG	2.312	1.035	2.04	1.079	1.65(1.27;2.145)	0.000179114	0.00160714	yes	0.00192857	yes	AG/GG	1.067	0.929	1.426	1.083	1.082(0.956;1.224)	0.213914	0.0298214	no	0.0357857	no
1	1	18	rs4722094	NA	A/G	0.761	G	1.409	1.134	1.007	1.002	1.195(1.072;1.332)	0.00131209	0.00464286	yes	0.00557143	yes	GG	1.366	1.481	1.25	1.132	1.318(0.96;1.809)	0.0876347	0.0232143	no	0.0278571	no	AG/GG	1.54	1.122	0.971	0.98	1.222(1.076;1.389)	0.00208348	0.00285714	yes	0.00342857	yes
0	0	19	rs4285687	NA	A/G	0.523	G	1.204	0.966	1.007	0.988	1.072(0.982;1.169)	0.121106	0.0301786	no	0.0362143	no	GG	1.662	0.882	0.986	0.999	1.173(1.013;1.357)	0.0328739	0.0180357	no	0.0216429	no	AG/GG	1.042	1.066	1.03	0.981	1.031(0.899;1.184)	0.660396	0.0426786	no	0.0512143	no
1	1	20	rs3763305	BTNL2	A/G	0.068	G	0.54	1	0.774	1.063	0.698(0.561;0.869)	0.00128382	0.00446429	yes	0.00535714	yes	GG	0.51	1	0.742	1.159	0.681(0.538;0.862)	0.00139133	0.00517857	yes	0.00621429	yes	AG/GG	0.749	1	0.991	0.12	0.747(0.351;1.592)	0.450373	0.0378571	no	0.0454286	no
1	1	21	rs1063192	CDKN2A	A/G	0.517	G	1.347	1.108	0.988	0.97	1.15(1.053;1.255)	0.00185216	0.00553571	yes	0.00664286	yes	GG	1.519	1.18	1.09	0.975	1.254(1.068;1.473)	0.00571336	0.00910714	yes	0.0109286	yes	AG/GG	1.453	1.123	0.922	0.952	1.166(1.025;1.326)	0.0197364	0.0116071	no	0.0139286	no
1	1	22	rs12446827	NA	A/G	0.668	G	1.313	1.203	1.079	0.983	1.18(1.071;1.3)	0.000832899	0.00303571	yes	0.00364286	yes	GG	1.977	1.116	1.437	0.84	1.431(1.143;1.79)	0.0017514	0.00589286	yes	0.00707143	yes	AG/GG	1.257	1.276	0.99	1.023	1.168(1.032;1.322)	0.0137648	0.00946429	no	0.0113571	no
1	1	23	rs2738173	DEFB1	A/G	0.842	G	0.712	0.855	1.013	0.96	0.831(0.743;0.928)	0.00107827	0.00392857	yes	0.00471429	yes	GG	0.804	1.016	1.264	0.916	0.956(0.699;1.307)	0.777821	0.0446429	no	0.0535714	no	AG/GG	0.652	0.793	0.973	0.945	0.778(0.683;0.887)	0.000164048	0.000535714	yes	0.000642857	yes
1	1	24	rs1016013	NA	A/G	0.373	G	1.3	1.168	1.186	1.089	1.206(1.105;1.317)	2.8711e-05	0.000714286	yes	0.000857143	yes	GG	1.527	1.19	1.236	1.077	1.306(1.146;1.489)	6.45705e-05	0.000892857	yes	0.00107143	yes	AG/GG	1.252	1.282	1.272	1.165	1.246(1.06;1.464)	0.00773005	0.00732143	no	0.00878571	yes
0	0	25	rs7825208	FGFR1	A/G	0.876	G	1.066	1.031	0.894	0.894	0.995(0.871;1.137)	0.943721	0.0492857	no	0.0591429	no	GG	4.348	0.666	1.123	1.312	1.657(0.995;2.761)	0.0525096	0.0194643	no	0.0233571	no	AG/GG	0.94	1.083	0.861	0.854	0.939(0.811;1.088)	0.402029	0.0366071	no	0.0439286	no
1	1	26	rs915179	LMNA	A/G	0.541	G	1.342	1.112	1.198	0.999	1.191(1.09;1.301)	0.000104419	0.00178571	yes	0.00214286	yes	GG	1.522	1.456	1.337	0.955	1.342(1.137;1.583)	0.000505679	0.00339286	yes	0.00407143	yes	AG/GG	1.459	1.037	1.204	1.029	1.215(1.067;1.383)	0.00321892	0.00392857	yes	0.00471429	yes
0	1	27	rs829751	NA	A/G	0.244	G	1.29	0.933	1.072	1.059	1.114(1.011;1.227)	0.0291957	0.0175	no	0.021	no	GG	1.498	0.911	1.123	1.233	1.232(1.088;1.396)	0.00103734	0.00464286	yes	0.00557143	yes	AG/GG	0.999	0.928	0.994	0.674	0.906(0.726;1.131)	0.384249	0.0353571	no	0.0424286	no
0	0	28	rs2334207	NA	A/C	0.51	C	0.821	0.942	1.019	1.105	0.93(0.853;1.015)	0.102135	0.0280357	no	0.0336429	no	CC	0.937	0.897	1.009	1.222	0.989(0.863;1.132)	0.86889	0.0471429	no	0.0565714	no	AC/CC	0.628	0.965	1.043	1.059	0.827(0.715;0.957)	0.0108022	0.00875	no	0.0105	no
0	1	29	rs12585627	NA	A/G	0.828	G	1.272	1.146	1.055	1.017	1.155(1.026;1.299)	0.0171255	0.0139286	no	0.0167143	no	GG	3.262	1.358	1.979	0.592	1.655(1.132;2.42)	0.00933331	0.0123214	yes	0.0147857	yes	AG/GG	1.176	1.151	0.951	1.097	1.12(0.979;1.282)	0.0998902	0.0232143	no	0.0278571	no
0	0	30	rs1568282	NA	A/G	0.117	G	0.666	1.039	1.239	1.023	0.885(0.767;1.02)	0.0922896	0.0275	no	0.033	no	GG	0.608	1.007	1.392	1.069	0.863(0.738;1.009)	0.0640274	0.0216071	no	0.0259286	no	AG/GG	1.381	1.689	0.443	0.641	1.006(0.566;1.791)	0.982441	0.0494643	no	0.0593571	no
0	1	31	rs17702471	GPC6	A/G	0.785	G	1.161	1.022	1.111	0.977	1.084(0.972;1.208)	0.147058	0.0317857	no	0.0381429	no	GG	2.512	1.673	1.613	1.142	1.81(1.347;2.431)	8.32738e-05	0.00125	yes	0.0015	yes	AG/GG	1.038	0.936	1.025	0.942	0.992(0.873;1.129)	0.908262	0.0475	no	0.057	no
1	1	32	rs6984496	XKR6	A/C	0.58	C	0.77	0.962	0.877	1.044	0.88(0.806;0.96)	0.00386966	0.00696429	yes	0.00835714	yes	CC	0.784	0.968	0.905	1.047	0.896(0.772;1.04)	0.149563	0.0278571	no	0.0334286	no	AC/CC	0.647	0.935	0.79	1.052	0.802(0.7;0.918)	0.0013596	0.0025	yes	0.003	yes
1	1	33	rs2758331	SOD2	A/C	0.521	C	0.75	0.96	1.055	0.901	0.866(0.794;0.945)	0.001209	0.00410714	yes	0.00492857	yes	CC	0.674	0.975	1.165	0.892	0.844(0.736;0.969)	0.0162143	0.0139286	no	0.0167143	yes	AC/CC	0.685	0.912	0.994	0.834	0.804(0.694;0.931)	0.00362598	0.00446429	yes	0.00535714	yes
0	1	34	rs701176	PCNXL2	A/G	0.197	G	1.022	0.858	1.075	1.003	0.986(0.885;1.098)	0.795192	0.0476786	no	0.0572143	no	GG	1.191	0.843	1.16	1.005	1.058(0.931;1.202)	0.385182	0.0355357	no	0.0426429	no	AG/GG	0.416	0.805	0.795	1.009	0.669(0.494;0.906)	0.00935085	0.00857143	no	0.0102857	yes
0	0	35	rs4245543	NA	A/G	0.61	G	0.866	1.125	0.946	1.164	0.991(0.908;1.082)	0.841849	0.0478571	no	0.0574286	no	GG	0.582	1.172	0.876	1.339	0.903(0.771;1.058)	0.205914	0.0310714	no	0.0372857	no	AG/GG	1.01	1.178	0.967	1.141	1.059(0.926;1.211)	0.399863	0.03625	no	0.0435	no
0	0	36	rs7246865	MYO9B	A/G	0.255	G	1.243	0.938	1.047	1.066	1.093(0.994;1.201)	0.065906	0.0244643	no	0.0293571	no	GG	1.16	0.883	1.096	1.188	1.09(0.963;1.234)	0.174392	0.0292857	no	0.0351429	no	AG/GG	2.073	0.984	0.938	0.821	1.187(0.963;1.464)	0.107268	0.0239286	no	0.0287143	no
0	1	37	rs9513192	NA	A/C	0.526	C	1.233	1.085	0.885	1.086	1.113(1.019;1.216)	0.0171196	0.01375	no	0.0165	no	CC	1.094	1.237	0.907	1.033	1.082(0.922;1.27)	0.33307	0.0344643	no	0.0413571	no	AC/CC	1.531	1.042	0.822	1.164	1.196(1.049;1.363)	0.00724997	0.00660714	no	0.00792857	yes
1	1	38	rs1412832	NA	A/G	0.653	G	1.353	1.145	1.062	1.014	1.186(1.078;1.304)	0.000454248	0.0025	yes	0.003	yes	GG	1.676	1.028	1.295	1.102	1.355(1.096;1.676)	0.00506705	0.00892857	yes	0.0107143	yes	AG/GG	1.397	1.213	1.002	0.987	1.2(1.06;1.358)	0.00385066	0.00464286	yes	0.00557143	yes
0	0	39	rs9557276	CLYBL	A/C	0.429	C	1.325	0.882	0.946	1.131	1.111(1.018;1.212)	0.0181538	0.0148214	no	0.0177857	no	CC	1.472	0.725	0.81	1.255	1.117(0.973;1.284)	0.116629	0.0260714	no	0.0312857	no	AC/CC	1.411	1.011	1.067	1.117	1.191(1.03;1.377)	0.0182694	0.0108929	no	0.0130714	no
0	1	40	rs6812745	SORCS2	A/G	0.842	G	0.828	0.904	0.939	0.943	0.885(0.79;0.991)	0.0342817	0.0189286	no	0.0227143	no	GG	0.334	0.777	0.888	1.03	0.652(0.46;0.922)	0.0156661	0.01375	no	0.0165	yes	AG/GG	0.898	0.91	0.941	0.923	0.912(0.8;1.04)	0.170587	0.0278571	no	0.0334286	no
0	0	41	rs7155817	NA	A/G	0.087	G	1.04	1.074	0.838	0.773	0.966(0.835;1.117)	0.642545	0.0460714	no	0.0552857	no	GG	1.165	1.044	0.802	0.775	0.995(0.849;1.165)	0.945981	0.0485714	no	0.0582857	no	AG/GG	0.124	1.5	1.046	0.549	0.79(0.432;1.444)	0.443369	0.0373214	no	0.0447857	no
1	1	42	rs10084768	NA	A/G	0.252	G	0.867	0.919	1.114	0.89	0.917(0.829;1.013)	0.089166	0.0273214	no	0.0327857	no	GG	0.969	0.985	1.244	0.781	0.964(0.852;1.091)	0.56398	0.0417857	no	0.0501429	no	AG/GG	0.461	0.645	0.807	1.495	0.675(0.523;0.871)	0.00255113	0.00321429	yes	0.00385714	yes
0	0	43	rs2061450	NA	A/G	0.205	G	1.291	0.872	0.819	1.012	1.051(0.947;1.167)	0.352276	0.0396429	no	0.0475714	no	GG	1.221	0.917	0.863	0.969	1.037(0.914;1.177)	0.568	0.0419643	no	0.0503571	no	AG/GG	2.266	0.624	0.561	1.426	1.164(0.882;1.536)	0.282126	0.0321429	no	0.0385714	no
0	1	44	rs10483493	TTC6	A/C	0.687	C	1.36	0.888	1.042	1.062	1.128(1.024;1.242)	0.0148483	0.0130357	no	0.0156429	yes	CC	1.681	0.847	0.919	1.333	1.241(0.993;1.551)	0.0580586	0.02	no	0.024	no	AC/CC	1.4	0.871	1.097	1.022	1.137(1.005;1.286)	0.0417814	0.0148214	no	0.0177857	no
0	0	45	rs2252024	NA	A/G	0.077	G	1.258	1.142	0.843	1.064	1.124(0.965;1.31)	0.133397	0.0308929	no	0.0370714	no	GG	1.163	1.167	0.865	1.03	1.093(0.927;1.289)	0.291448	0.03375	no	0.0405	no	AG/GG	7.559	1.039	0.592	3.401	1.578(0.774;3.217)	0.208968	0.0294643	no	0.0353571	no
0	0	46	rs899430	NA	A/G	0.713	G	1.132	0.755	0.863	1.178	0.998(0.905;1.101)	0.971746	0.0496429	no	0.0595714	no	GG	2.03	0.625	0.711	1.012	1.141(0.899;1.449)	0.276497	0.0332143	no	0.0398571	no	AG/GG	1.005	0.729	0.872	1.275	0.961(0.85;1.086)	0.526198	0.0394643	no	0.0473571	no
0	0	47	rs6997589	SH2D4A	A/G	0.715	G	1.372	0.932	0.878	0.961	1.102(0.995;1.221)	0.0617253	0.0235714	no	0.0282857	no	GG	1.592	0.868	0.78	0.707	1.111(0.854;1.445)	0.434457	0.0383929	no	0.0460714	no	AG/GG	1.439	0.926	0.873	1.007	1.127(0.995;1.277)	0.060874	0.0176786	no	0.0212143	no
1	1	48	rs11783247	XKR6	A/G	0.576	G	0.784	1.067	0.851	1.029	0.901(0.826;0.983)	0.0191051	0.0151786	no	0.0182143	no	GG	0.809	1.175	0.86	1.045	0.946(0.815;1.099)	0.470566	0.0394643	no	0.0473571	no	AG/GG	0.657	1.011	0.765	1.037	0.815(0.712;0.933)	0.00304618	0.00357143	yes	0.00428571	yes
0	1	49	rs5758008	MKL1	A/G	0.629	G	1.187	1.003	0.961	1.255	1.119(1.022;1.225)	0.0147743	0.0128571	no	0.0154286	yes	GG	1.75	0.805	0.826	1.627	1.281(1.067;1.537)	0.00776262	0.0116071	yes	0.0139286	yes	AG/GG	1.068	1.136	1.005	1.218	1.102(0.973;1.249)	0.125552	0.0253571	no	0.0304286	no
0	0	50	rs9530108	NBEA	A/G	0.854	G	0.797	0.809	0.832	1.237	0.888(0.794;0.993)	0.0371169	0.0198214	no	0.0237857	no	GG	0.26	1.038	0.372	2.002	0.837(0.576;1.217)	0.35261	0.0348214	no	0.0417857	no	AG/GG	0.837	0.725	0.883	1.201	0.878(0.77;1)	0.0499908	0.0167857	no	0.0201429	no
0	0	51	rs1505696	NA	A/G	0.622	G	1.252	0.899	0.982	0.986	1.065(0.973;1.165)	0.173022	0.0328571	no	0.0394286	no	GG	1.08	0.858	1.104	1.256	1.059(0.882;1.272)	0.5395	0.0410714	no	0.0492857	no	AG/GG	1.475	0.875	0.923	0.869	1.095(0.967;1.24)	0.153688	0.0276786	no	0.0332143	no
0	0	52	rs7959761	SSPN	A/G	0.81	G	1.006	1.079	1.174	1.049	1.056(0.95;1.173)	0.312271	0.0378571	no	0.0454286	no	GG	2.471	0.998	0.583	1.096	1.278(0.956;1.708)	0.0980215	0.0244643	no	0.0293571	no	AG/GG	0.87	1.125	1.369	1.062	1.03(0.907;1.17)	0.649251	0.0421429	no	0.0505714	no
1	1	53	rs4363980	NA	A/C	0.184	C	0.793	1.01	0.811	0.962	0.885(0.793;0.988)	0.0298848	0.0178571	no	0.0214286	no	CC	0.842	1.04	0.841	0.988	0.918(0.806;1.045)	0.195539	0.0307143	no	0.0368571	no	AC/CC	0.324	0.891	0.484	0.792	0.605(0.431;0.848)	0.00358393	0.00428571	yes	0.00514286	yes
0	0	54	rs1016339	NA	A/G	0.205	G	0.708	1.196	0.945	1.027	0.896(0.799;1.004)	0.0583083	0.0232143	no	0.0278571	no	GG	0.667	1.194	0.974	1.017	0.876(0.768;0.999)	0.0488795	0.0189286	no	0.0227143	no	AG/GG	0.675	1.441	0.735	1.157	0.913(0.65;1.281)	0.597708	0.0410714	no	0.0492857	no
0	0	55	rs10505391	NA	A/G	0.053	G	1.658	0.765	1.019	0.643	0.965(0.611;1.524)	0.87891	0.0483929	no	0.0580714	no	GG	1.65	0.74	1.121	0.584	0.955(0.582;1.565)	0.854592	0.0460714	no	0.0552857	no	AG/GG	3.25	0.868	0.441	2.63	1.247(0.637;2.443)	0.519187	0.0391071	no	0.0469286	no
0	0	56	rs4461634	NA	A/G	0.154	G	1.346	0.889	0.768	0.938	1.042(0.931;1.166)	0.474493	0.0430357	no	0.0516429	no	GG	1.5	0.865	0.805	0.908	1.085(0.951;1.237)	0.224252	0.0317857	no	0.0381429	no	AG/GG	0.941	0.891	0.484	1.041	0.851(0.614;1.178)	0.330848	0.0335714	no	0.0402857	no
0	0	57	rs1002098	NA	A/C	0.149	C	0.801	0.862	1.939	0.999	0.95(0.842;1.073)	0.4093	0.0408929	no	0.0490714	no	CC	0.853	0.862	2.223	1.031	0.999(0.871;1.146)	0.99062	0.0498214	no	0.0597857	no	AC/CC	0.249	0.706	1.356	0.781	0.632(0.422;0.947)	0.02608	0.0130357	no	0.0156429	no
0	1	58	rs11063009	NA	A/G	0.267	G	1.141	0.888	1.119	1.11	1.067(0.969;1.174)	0.186085	0.0342857	no	0.0411429	no	GG	1.015	0.912	1.125	1.026	1.007(0.891;1.138)	0.910428	0.0478571	no	0.0574286	no	AG/GG	1.969	0.737	1.267	1.556	1.358(1.085;1.7)	0.00752004	0.00696429	no	0.00835714	yes
1	1	59	rs7800926	PFTK1	A/G	0.045	G	1.671	1	0.984	1.401	1.399(1.145;1.709)	0.00101752	0.00375	yes	0.0045	yes	GG	1.77	1	0.975	1.493	1.468(1.18;1.826)	0.000570622	0.00375	yes	0.0045	yes	AG/GG	1.172	1	1.116	1.246	1.149(0.569;2.319)	0.698103	0.04375	no	0.0525	no
0	0	60	rs1834461	NA	A/G	0.274	G	0.901	1.192	1.084	1.111	1.027(0.93;1.135)	0.596021	0.0448214	no	0.0537857	no	GG	1.028	1.22	1.245	1.051	1.104(0.975;1.249)	0.117203	0.02625	no	0.0315	no	AG/GG	0.501	1.274	0.725	1.579	0.816(0.642;1.037)	0.0962152	0.0228571	no	0.0274286	no
0	0	61	rs5754682	LARGE	A/G	0.857	G	1.217	1.073	0.961	0.733	1.033(0.905;1.179)	0.633406	0.0457143	no	0.0548571	no	GG	3.393	0.96	0.799	0.261	1.246(0.775;2.004)	0.364727	0.0351786	no	0.0422143	no	AG/GG	1.116	1.09	0.984	0.769	1.01(0.872;1.171)	0.894061	0.0467857	no	0.0561429	no
0	0	62	rs6443429	TBL1XR1	A/C	0.321	C	1.125	0.958	1.135	0.945	1.046(0.954;1.146)	0.335989	0.0389286	no	0.0467143	no	CC	0.982	1.01	1.129	0.929	0.997(0.882;1.128)	0.966127	0.0492857	no	0.0591429	no	AC/CC	1.807	0.832	1.312	0.939	1.211(1;1.467)	0.0498087	0.0166071	no	0.0199286	no
0	0	63	rs4933309	NA	A/G	0.353	G	0.76	0.881	1.078	1.091	0.894(0.816;0.98)	0.017266	0.0141071	no	0.0169286	no	GG	0.774	0.812	1.023	1.24	0.895(0.79;1.013)	0.0785849	0.0226786	no	0.0272143	no	AG/GG	0.553	0.962	1.273	0.882	0.797(0.656;0.969)	0.0227242	0.0121429	no	0.0145714	no
1	1	64	rs216148	CSF1R	A/G	0.124	G	0.692	1.011	0.55	0.798	0.753(0.655;0.865)	6.35615e-05	0.000892857	yes	0.00107143	yes	GG	0.726	1.011	0.541	0.796	0.765(0.656;0.892)	0.000616095	0.00392857	yes	0.00471429	yes	AG/GG	0.214	1.022	0.366	0.555	0.478(0.283;0.807)	0.00576213	0.00553571	no	0.00664286	yes
0	0	65	rs1470196	KIAA1377	A/G	0.191	G	1.322	0.961	1.113	0.882	1.099(0.99;1.22)	0.0759088	0.0257143	no	0.0308571	no	GG	1.268	0.877	1.193	0.91	1.075(0.948;1.219)	0.257198	0.0325	no	0.039	no	AG/GG	2.329	1.357	0.93	0.622	1.346(1.011;1.793)	0.0418844	0.015	no	0.018	no
0	0	66	rs452707	NA	A/G	0.421	G	0.875	0.939	1.338	0.991	0.97(0.887;1.06)	0.499869	0.0435714	no	0.0522857	no	GG	1.018	0.831	1.428	0.964	1.006(0.887;1.141)	0.927737	0.0482143	no	0.0578571	no	AG/GG	0.608	1.212	1.519	1.035	0.88(0.739;1.048)	0.151027	0.0275	no	0.033	no
0	0	67	rs9308765	NA	A/G	0.118	G	0.81	1.078	0.891	0.905	0.904(0.791;1.034)	0.142486	0.03125	no	0.0375	no	GG	0.868	1.102	0.896	0.872	0.926(0.798;1.075)	0.31165	0.0342857	no	0.0411429	no	AG/GG	0.192	0.991	0.743	1.095	0.693(0.424;1.132)	0.143207	0.0271429	no	0.0325714	no
0	0	68	rs1858897	NA	A/G	0.242	G	1.281	0.969	1.119	0.987	1.109(1.008;1.219)	0.0342222	0.01875	no	0.0225	no	GG	1.23	0.933	1.234	0.955	1.097(0.97;1.241)	0.139393	0.0275	no	0.033	no	AG/GG	2.06	1.017	0.927	1.12	1.268(1.02;1.577)	0.0325443	0.0142857	no	0.0171429	no
1	1	69	rs767478	NA	A/G	0.248	G	0.866	1.02	0.872	0.918	0.912(0.824;1.009)	0.075294	0.0255357	no	0.0306429	no	GG	0.951	1.086	0.877	0.917	0.963(0.85;1.091)	0.553397	0.0416071	no	0.0499286	no	AG/GG	0.448	0.809	0.73	0.85	0.647(0.495;0.846)	0.00142435	0.00267857	yes	0.00321429	yes
0	1	70	rs828154	NA	A/G	0.682	G	1.201	1.047	1.026	1.173	1.134(1.03;1.247)	0.00997805	0.00964286	no	0.0115714	yes	GG	1.941	0.824	0.897	1.241	1.293(1.033;1.619)	0.0249835	0.0164286	no	0.0197143	no	AG/GG	1.117	1.134	1.082	1.217	1.135(1.004;1.283)	0.0435808	0.0157143	no	0.0188571	no
0	1	71	rs2866705	NA	A/G	0.545	G	1.195	1.072	0.963	1.032	1.096(1.004;1.195)	0.0399836	0.0203571	no	0.0244286	no	GG	1.604	1.169	0.83	1.158	1.266(1.082;1.481)	0.00328768	0.0075	yes	0.009	yes	AG/GG	1.071	1.05	1.057	0.981	1.045(0.916;1.191)	0.515467	0.03875	no	0.0465	no
1	1	72	rs1042663	C2	A/G	0.109	G	0.662	0.838	0.712	0.944	0.759(0.653;0.882)	0.000307595	0.00196429	yes	0.00235714	yes	GG	0.617	0.808	0.629	0.988	0.72(0.612;0.848)	8.37856e-05	0.00142857	yes	0.00171429	yes	AG/GG	1.235	1.112	1.361	0.409	0.986(0.54;1.797)	0.962359	0.04875	no	0.0585	no
0	0	73	rs6105966	C20orf79	A/G	0.818	G	1.216	0.86	1.119	1.131	1.089(0.971;1.222)	0.146115	0.0316071	no	0.0379286	no	GG	0.594	0.759	1.352	0.979	0.783(0.554;1.109)	0.168423	0.02875	no	0.0345	no	AG/GG	1.393	0.858	1.113	1.182	1.163(1.018;1.329)	0.0259263	0.0128571	no	0.0154286	no
1	1	74	rs9397084	SYNE1	A/G	0.77	G	1.394	1.281	1.141	0.921	1.221(1.093;1.363)	0.000397807	0.00214286	yes	0.00257143	yes	GG	1.536	2.804	1.219	1.718	1.68(1.225;2.304)	0.00127139	0.005	yes	0.006	yes	AG/GG	1.461	1.19	1.17	0.825	1.205(1.057;1.372)	0.00509266	0.00517857	yes	0.00621429	yes
0	1	75	rs563384	NA	A/G	0.84	G	1.152	1.022	1.023	1.105	1.089(0.967;1.228)	0.160284	0.0325	no	0.039	no	GG	3.518	1.217	1.763	2.539	1.969(1.295;2.992)	0.00151387	0.00553571	yes	0.00664286	yes	AG/GG	1.064	0.996	0.956	1.06	1.031(0.901;1.18)	0.657888	0.0425	no	0.051	no
0	0	76	rs277432	NA	A/G	0.313	G	1.327	1.076	0.739	0.841	0.981(0.753;1.276)	0.883811	0.0485714	no	0.0582857	no	GG	1.373	0.975	0.624	0.748	0.902(0.633;1.286)	0.568556	0.0421429	no	0.0505714	no	AG/GG	1.623	1.484	0.823	0.931	1.267(1.046;1.533)	0.0154141	0.00964286	no	0.0115714	no
1	1	77	rs590211	NA	A/G	0.345	G	0.755	1.003	0.811	1.004	0.861(0.784;0.946)	0.00182595	0.00535714	yes	0.00642857	yes	GG	0.686	1.025	0.856	0.913	0.825(0.729;0.933)	0.00222197	0.00642857	yes	0.00771429	yes	AG/GG	0.74	0.935	0.565	1.342	0.834(0.676;1.027)	0.0878956	0.0210714	no	0.0252857	no
0	0	78	rs303542	NA	A/G	0.09	G	1.127	0.918	1.453	1.056	1.068(0.933;1.222)	0.337477	0.0392857	no	0.0471429	no	GG	1.04	0.87	1.678	0.981	1.027(0.884;1.192)	0.730562	0.0439286	no	0.0527143	no	AG/GG	7.163	1.149	0.618	3.149	1.475(0.896;2.429)	0.126694	0.0257143	no	0.0308571	no
1	1	79	rs2432143	ITGA1	A/G	0.883	G	1.362	1.44	1.026	0.968	1.236(1.068;1.431)	0.00459003	0.00714286	yes	0.00857143	yes	GG	0.566	1.366	1.073	1.119	0.834(0.46;1.512)	0.549374	0.0414286	no	0.0497143	no	AG/GG	1.517	1.491	1.025	0.962	1.294(1.106;1.515)	0.00133233	0.00232143	yes	0.00278571	yes
1	1	80	rs9977638	BTG3	A/G	0.372	G	1.299	0.995	1.244	0.763	1.055(0.828;1.344)	0.667235	0.0466071	no	0.0559286	no	GG	1.295	0.896	1.402	0.603	0.996(0.689;1.44)	0.982812	0.0496429	no	0.0595714	no	AG/GG	1.651	1.147	1.182	0.908	1.269(1.075;1.498)	0.0047834	0.005	yes	0.006	yes
0	0	81	rs8003961	DLG7	A/G	0.908	G	0.914	0.947	1.074	1.104	0.98(0.848;1.134)	0.788827	0.0475	no	0.057	no	GG	0.14	1.739	0.378	1.188	0.778(0.413;1.464)	0.43598	0.0385714	no	0.0462857	no	AG/GG	0.993	0.881	1.193	1.117	1.013(0.864;1.189)	0.86951	0.0464286	no	0.0557143	no
1	1	82	rs1800392	WRN	A/C	0.481	C	0.842	0.919	1.071	0.951	0.912(0.836;0.995)	0.038509	0.0201786	no	0.0242143	no	CC	0.948	0.946	1.255	0.957	0.988(0.866;1.128)	0.857595	0.04625	no	0.0555	no	AC/CC	0.636	0.815	0.923	0.906	0.761(0.652;0.889)	0.000569828	0.00160714	yes	0.00192857	yes
0	0	83	rs8018467	NA	A/G	0.072	G	1.516	0.924	1.018	0.738	1.105(0.947;1.289)	0.205392	0.0357143	no	0.0428571	no	GG	1.617	0.931	1.037	0.742	1.146(0.97;1.354)	0.109958	0.0257143	no	0.0308571	no	AG/GG	1.001	0.742	0.894	0.385	0.765(0.416;1.406)	0.387915	0.0355357	no	0.0426429	no
0	0	84	rs2660888	NA	A/G	0.509	G	0.881	1.07	0.948	1.302	1.008(0.924;1.099)	0.866233	0.0482143	no	0.0578571	no	GG	0.654	0.951	1.217	1.261	0.899(0.781;1.035)	0.137322	0.0269643	no	0.0323571	no	AG/GG	1.098	1.276	0.698	1.595	1.147(0.993;1.325)	0.062906	0.0182143	no	0.0218571	no
0	0	85	rs6115865	NA	A/G	0.283	G	1.133	1.068	1.132	0.915	1.067(0.971;1.173)	0.180021	0.03375	no	0.0405	no	GG	1.005	1.123	1.315	0.919	1.053(0.931;1.191)	0.407279	0.0367857	no	0.0441429	no	AG/GG	1.891	0.97	0.79	0.82	1.175(0.946;1.46)	0.144609	0.0273214	no	0.0327857	no
0	0	86	rs4141153	NA	A/G	0.782	G	1.283	0.903	0.902	1.176	1.105(0.991;1.233)	0.0720481	0.0251786	no	0.0302143	no	GG	2.523	0.718	0.725	1.022	1.24(0.902;1.706)	0.18542	0.0303571	no	0.0364286	no	AG/GG	1.223	0.918	0.921	1.273	1.108(0.974;1.26)	0.117824	0.0246429	no	0.0295714	no
0	1	87	rs11086106	PGPEP1	A/G	0.932	G	1.738	1.238	0.896	0.891	1.272(1.057;1.53)	0.0107529	0.0101786	no	0.0122143	yes	GG	3.434	1.346	0.892	0.477	1.445(0.587;3.557)	0.423567	0.0380357	no	0.0456429	no	AG/GG	1.739	1.253	0.89	0.908	1.283(1.056;1.56)	0.0123289	0.00910714	no	0.0109286	no
0	0	88	rs2383722	C9orf11	A/C	0.59	C	1.263	0.889	1.117	0.776	1.035(0.947;1.132)	0.446355	0.0419643	no	0.0503571	no	CC	1.656	0.792	1.249	0.716	1.131(0.953;1.342)	0.159247	0.0285714	no	0.0342857	no	AC/CC	1.208	0.893	1.104	0.724	1(0.882;1.134)	0.997626	0.05	no	0.06	no
1	1	89	rs2253363	NA	A/G	0.661	G	0.758	0.865	1.17	0.915	0.866(0.791;0.947)	0.0016577	0.005	yes	0.006	yes	GG	0.701	0.873	1.438	1.075	0.888(0.745;1.059)	0.186097	0.0305357	no	0.0366429	no	AG/GG	0.703	0.808	1.145	0.813	0.802(0.708;0.91)	0.000587098	0.00178571	yes	0.00214286	yes
0	0	90	rs982764	FAS	A/G	0.717	G	0.911	1.017	1.411	1.084	1.035(0.941;1.138)	0.478365	0.0432143	no	0.0518571	no	GG	0.525	1.083	1.944	0.975	0.885(0.709;1.106)	0.283914	0.0335714	no	0.0402857	no	AG/GG	1.045	1.007	1.406	1.154	1.103(0.976;1.247)	0.114817	0.0244643	no	0.0293571	no
0	0	91	rs514217	NA	A/G	0.533	G	1.189	1.035	1.08	0.895	1.071(0.981;1.168)	0.123936	0.0307143	no	0.0368571	no	GG	1.576	1.217	0.915	0.819	1.204(1.032;1.404)	0.0181969	0.015	no	0.018	no	AG/GG	1.06	0.93	1.258	0.896	1.02(0.894;1.165)	0.765001	0.0448214	no	0.0537857	no
0	0	92	rs2963154	NR3C1	A/G	0.846	G	1.097	0.99	1.006	0.966	1.038(0.911;1.182)	0.578455	0.0444643	no	0.0533571	no	GG	3.185	0.889	0.665	1.042	1.693(1.027;2.792)	0.0390532	0.0182143	no	0.0218571	no	AG/GG	0.992	0.995	1.046	0.95	0.992(0.857;1.148)	0.911386	0.0476786	no	0.0572143	no
0	0	93	rs11687681	NA	A/G	0.342	G	1.291	0.945	1.012	0.99	1.096(1.003;1.199)	0.0434371	0.0208929	no	0.0250714	no	GG	1.459	0.927	0.954	1.014	1.149(1.013;1.304)	0.0313605	0.0175	no	0.021	no	AG/GG	1.283	0.937	1.142	0.95	1.088(0.918;1.291)	0.330778	0.0333929	no	0.0400714	no
1	1	94	rs336264	NA	A/G	0.889	G	0.773	0.647	0.955	1.008	0.811(0.711;0.926)	0.00193833	0.00589286	yes	0.00707143	yes	GG	0.233	0.531	1.548	0.777	0.602(0.368;0.986)	0.0438097	0.0185714	no	0.0222857	no	AG/GG	0.816	0.63	0.891	1.041	0.821(0.709;0.95)	0.00810487	0.00785714	no	0.00942857	yes
0	0	95	rs4902538	RAD51L1	A/G	0.213	G	0.777	0.843	1.216	1.043	0.9(0.812;0.997)	0.0443149	0.02125	no	0.0255	no	GG	0.818	0.82	1.284	1.015	0.911(0.802;1.035)	0.151489	0.0282143	no	0.0338571	no	AG/GG	0.405	0.77	1.153	1.249	0.758(0.58;0.99)	0.0420531	0.0151786	no	0.0182143	no
0	0	96	rs12044217	NA	A/G	0.19	G	0.749	1.163	1.041	1.013	0.918(0.817;1.032)	0.153244	0.0319643	no	0.0383571	no	GG	0.673	1.107	0.969	0.958	0.851(0.744;0.973)	0.0180103	0.0148214	no	0.0177857	no	AG/GG	1.133	2.433	1.615	1.485	1.441(0.989;2.099)	0.0572707	0.0175	no	0.021	no
0	0	97	rs2880540	NA	A/G	0.874	G	0.857	0.973	0.691	1.074	0.902(0.796;1.021)	0.102252	0.0282143	no	0.0338571	no	GG	0.233	0.761	0.592	4.035	0.688(0.428;1.105)	0.121875	0.0266071	no	0.0319286	no	AG/GG	0.917	1.007	0.67	0.984	0.915(0.796;1.051)	0.208936	0.0292857	no	0.0351429	no
0	1	98	rs11610554	NA	A/G	0.13	G	1.39	0.9	1.174	1.016	1.13(1.007;1.268)	0.038431	0.02	no	0.024	no	GG	1.501	0.923	1.232	0.97	1.176(1.03;1.343)	0.016809	0.0142857	no	0.0171429	yes	AG/GG	1.135	0.657	0.995	1.42	1.001(0.693;1.445)	0.997606	0.0498214	no	0.0597857	no
0	1	99	rs10190125	MYT1L	A/G	0.325	G	1.235	1.009	1.184	1.009	1.126(1.027;1.235)	0.0112496	0.0107143	no	0.0128571	yes	GG	1.452	1.038	1.361	1.053	1.245(1.1;1.409)	0.00053357	0.00357143	yes	0.00428571	yes	AG/GG	1.057	0.95	0.998	0.922	0.995(0.824;1.201)	0.956072	0.0483929	no	0.0580714	no
0	0	100	rs7853840	LRRN6C	A/G	0.952	G	0.711	1.34	1.297	0.972	1.005(0.85;1.187)	0.955631	0.0494643	no	0.0593571	no	GG	3.065	2.375	1.344	1.058	1.975(0.967;4.034)	0.0618558	0.0210714	no	0.0252857	no	AG/GG	0.636	1.324	1.313	0.962	0.96(0.803;1.147)	0.652377	0.0423214	no	0.0507857	no
0	0	101	rs1368774	NA	A/G	0.748	G	0.856	1.125	1.002	0.947	0.953(0.864;1.051)	0.335937	0.03875	no	0.0465	no	GG	0.5	1.209	1.276	1.431	0.887(0.696;1.131)	0.334475	0.0346429	no	0.0415714	no	AG/GG	0.937	1.145	0.923	0.858	0.963(0.851;1.089)	0.54724	0.0401786	no	0.0482143	no
0	0	102	rs11211037	PLK3	A/C	0.666	C	0.807	1.072	1.101	0.893	0.916(0.836;1.005)	0.0627374	0.02375	no	0.0285	no	CC	0.932	0.956	1.133	0.751	0.924(0.764;1.118)	0.417319	0.0373214	no	0.0447857	no	AC/CC	0.689	1.135	1.13	0.922	0.884(0.781;1.001)	0.05124	0.0173214	no	0.0207857	no
0	0	103	rs697887	NA	A/G	0.723	G	1.356	0.967	1.022	0.887	1.1(0.995;1.215)	0.0616757	0.0233929	no	0.0280714	no	GG	1.846	0.883	1.254	0.921	1.269(0.997;1.616)	0.0527123	0.0198214	no	0.0237857	no	AG/GG	1.355	0.978	0.973	0.84	1.085(0.959;1.229)	0.195853	0.0289286	no	0.0347143	no
0	0	104	rs2243115	IL12A	A/C	0.874	C	1.106	1.204	0.91	0.987	1.07(0.939;1.219)	0.311805	0.0376786	no	0.0452143	no	CC	3.826	1.009	1.351	0.671	1.469(0.924;2.336)	0.103912	0.0248214	no	0.0297857	no	AC/CC	1.004	1.258	0.849	1.024	1.036(0.896;1.198)	0.631221	0.0414286	no	0.0497143	no
1	1	105	rs751481	NA	A/G	0.549	G	0.79	0.904	0.925	0.976	0.872(0.799;0.951)	0.00186967	0.00571429	yes	0.00685714	yes	GG	0.651	0.802	1.017	0.996	0.796(0.687;0.922)	0.0023448	0.00660714	yes	0.00792857	yes	AG/GG	0.815	0.936	0.824	0.947	0.869(0.758;0.996)	0.0433102	0.0155357	no	0.0186429	no
0	0	106	rs1860242	CTNND2	A/G	0.278	G	1.089	1.021	1.011	0.961	1.034(0.94;1.139)	0.489721	0.0433929	no	0.0520714	no	GG	1.303	1.039	1.075	1.019	1.143(1.011;1.292)	0.0325499	0.0178571	no	0.0214286	no	AG/GG	0.691	0.983	0.809	0.75	0.777(0.623;0.968)	0.0244093	0.0126786	no	0.0152143	no
0	1	107	rs10923673	NA	A/C	0.908	C	0.709	0.909	0.899	1.173	0.857(0.742;0.989)	0.0353021	0.0194643	no	0.0233571	no	CC	1.36	1.003	1.806	1.744	1.353(0.784;2.336)	0.27768	0.0333929	no	0.0400714	no	AC/CC	0.645	0.893	0.843	1.158	0.81(0.692;0.947)	0.00844185	0.00803571	no	0.00964286	yes
0	1	108	rs3904864	NA	A/G	0.438	G	1.303	1.093	0.981	0.941	1.123(1.029;1.225)	0.00913634	0.00892857	no	0.0107143	yes	GG	1.412	1.158	0.962	1.001	1.195(1.037;1.376)	0.0138923	0.0133929	no	0.0160714	yes	AG/GG	1.406	1.113	0.99	0.847	1.135(0.986;1.308)	0.0775552	0.0194643	no	0.0233571	no
0	0	109	rs9652250	NA	A/G	0.112	G	1.452	0.982	0.796	1.068	1.13(0.999;1.278)	0.0525603	0.0226786	no	0.0272143	no	GG	1.5	0.934	0.751	1.065	1.125(0.979;1.293)	0.0971462	0.0242857	no	0.0291429	no	AG/GG	1.866	1.494	0.995	1.204	1.422(0.922;2.193)	0.110983	0.0242857	no	0.0291429	no
1	1	110	rs855137	NA	A/G	0.171	G	1.36	1.025	1.161	0.999	1.166(1.046;1.3)	0.00574535	0.0075	yes	0.009	yes	GG	1.462	1.001	1.157	1.035	1.202(1.058;1.366)	0.00477079	0.00875	yes	0.0105	yes	AG/GG	1.304	1.231	1.378	0.772	1.174(0.859;1.606)	0.314301	0.0328571	no	0.0394286	no
0	0	111	rs10505561	NA	A/G	0.198	G	0.806	1.381	1.046	0.889	0.964(0.861;1.079)	0.522459	0.0441071	no	0.0529286	no	GG	0.851	1.426	1.075	0.94	1.01(0.886;1.152)	0.879372	0.0475	no	0.057	no	AG/GG	0.368	1.814	0.96	0.537	0.676(0.473;0.966)	0.031795	0.0139286	no	0.0167143	no
0	1	112	rs12634249	SUMF1	A/C	0.214	C	1.177	0.922	1.103	1.143	1.098(0.989;1.219)	0.0792292	0.02625	no	0.0315	no	CC	1.071	0.858	1.189	1.164	1.052(0.928;1.193)	0.429963	0.0382143	no	0.0458571	no	AC/CC	2.089	1.235	0.903	1.198	1.446(1.101;1.899)	0.00796162	0.0075	no	0.009	yes
0	1	113	rs1998536	NA	A/G	0.828	G	1.086	1.152	1.204	1.033	1.102(0.976;1.244)	0.115526	0.0294643	no	0.0353571	no	GG	2.715	1.352	1.197	0.973	1.68(1.121;2.517)	0.0119335	0.0130357	yes	0.0156429	yes	AG/GG	0.975	1.158	1.243	1.049	1.061(0.924;1.218)	0.401457	0.0364286	no	0.0437143	no
1	1	114	rs8098316	NA	A/C	0.122	C	0.925	0.996	0.788	0.891	0.909(0.79;1.046)	0.182391	0.0339286	no	0.0407143	no	CC	1.002	1.071	0.784	0.904	0.959(0.823;1.117)	0.589982	0.0428571	no	0.0514286	no	AC/CC	0.203	0.461	0.592	0.663	0.407(0.223;0.744)	0.00347021	0.00410714	yes	0.00492857	yes
0	1	115	rs17044026	ESRRG	A/C	0.107	C	0.687	0.923	0.812	1.1	0.828(0.713;0.962)	0.0136888	0.0123214	no	0.0147857	yes	CC	0.724	0.909	0.804	1.11	0.843(0.717;0.992)	0.0397515	0.0183929	no	0.0220714	no	AC/CC	0.203	1.119	0.745	0.957	0.512(0.263;0.996)	0.0487199	0.0164286	no	0.0197143	no
0	0	116	rs1557967	TBXAS1	A/G	0.207	G	0.804	0.978	1.118	1.156	0.955(0.858;1.063)	0.39707	0.0403571	no	0.0484286	no	GG	0.86	0.93	1.213	1.215	0.988(0.87;1.123)	0.85446	0.0458929	no	0.0550714	no	AG/GG	0.422	1.198	0.842	1.111	0.779(0.582;1.044)	0.0946577	0.0225	no	0.027	no
0	0	117	rs765850	APBB2	A/G	0.355	G	1.098	1.14	0.884	0.765	1(0.914;1.095)	0.992995	0.05	no	0.06	no	GG	0.939	1.185	0.809	0.745	0.925(0.816;1.048)	0.219733	0.0316071	no	0.0379286	no	AG/GG	1.708	1.183	0.939	0.637	1.165(0.968;1.403)	0.106993	0.02375	no	0.0285	no
1	1	118	rs1525501	NA	A/G	0.128	G	0.761	0.836	0.51	0.719	0.724(0.63;0.831)	4.94275e-06	0.000357143	yes	0.000428571	yes	GG	0.802	0.839	0.457	0.714	0.729(0.627;0.848)	4.13541e-05	0.000714286	yes	0.000857143	yes	AG/GG	0.227	0.593	0.743	0.425	0.401(0.22;0.73)	0.00277657	0.00339286	yes	0.00407143	yes
0	1	119	rs1389488	NA	A/G	0.097	G	0.678	0.988	0.978	0.833	0.817(0.698;0.955)	0.0111723	0.0105357	no	0.0126429	yes	GG	0.623	0.977	0.974	0.861	0.79(0.668;0.935)	0.00602359	0.00946429	yes	0.0113571	yes	AG/GG	1.467	1.064	0.995	0.41	1.034(0.571;1.871)	0.912653	0.0478571	no	0.0574286	no
0	0	120	rs2679234	NA	A/G	0.506	G	0.834	0.988	0.993	1.196	0.957(0.878;1.044)	0.325695	0.0385714	no	0.0462857	no	GG	0.928	1.009	0.966	1.132	0.993(0.865;1.139)	0.917225	0.0480357	no	0.0576429	no	AG/GG	0.657	0.958	1.018	1.466	0.894(0.772;1.034)	0.13128	0.0264286	no	0.0317143	no
0	0	121	rs1991289	DSG1	A/C	0.7	C	0.945	1.088	0.849	0.853	0.938(0.852;1.032)	0.191143	0.035	no	0.042	no	CC	1.496	1.474	0.902	0.666	1.161(0.934;1.444)	0.17814	0.0296429	no	0.0355714	no	AC/CC	0.787	1.041	0.788	0.882	0.859(0.759;0.972)	0.0158372	0.0101786	no	0.0122143	no
0	1	122	rs2014547	NA	A/G	0.762	G	1.355	1	0.968	1.044	1.15(1.031;1.284)	0.0123292	0.0114286	no	0.0137143	yes	GG	1.384	0.939	1.359	1.129	1.244(0.909;1.701)	0.172261	0.0291071	no	0.0349286	no	AG/GG	1.451	1.009	0.9	1.051	1.174(1.031;1.337)	0.0157408	0.00982143	no	0.0117857	no
0	0	123	rs1429842	SLC25A21	A/G	0.033	G	1.757	0.837	1.005	0.734	1.073(0.891;1.292)	0.456299	0.0425	no	0.051	no	GG	1.709	0.812	1.032	0.755	1.066(0.876;1.298)	0.52304	0.0405357	no	0.0486429	no	AG/GG	3.985	0.984	0.741	0.143	1.147(0.544;2.418)	0.718467	0.0444643	no	0.0533571	no
0	1	124	rs3804474	FLJ33708	A/G	0.473	G	1.217	0.895	1.179	0.907	1.065(0.976;1.163)	0.157004	0.0321429	no	0.0385714	no	GG	1.508	0.806	1.391	0.935	1.201(1.037;1.39)	0.0144153	0.0135714	no	0.0162857	yes	AG/GG	1.115	0.908	1.121	0.817	0.993(0.864;1.14)	0.916528	0.0480357	no	0.0576429	no
0	0	125	rs2312243	NA	A/G	0.088	G	1.088	1.16	1.032	1.168	1.109(0.952;1.292)	0.184296	0.0341071	no	0.0409286	no	GG	0.989	1.153	1.01	1.225	1.07(0.908;1.261)	0.419623	0.0376786	no	0.0452143	no	AG/GG	5.356	1.476	1.51	0.476	1.94(0.929;4.052)	0.0776699	0.0196429	no	0.0235714	no
0	1	126	rs401974	NA	A/G	0.521	G	1.19	0.952	1	1.042	1.072(0.983;1.169)	0.114274	0.0292857	no	0.0351429	no	GG	1.55	0.882	1.163	1.14	1.229(1.055;1.431)	0.0079819	0.0119643	yes	0.0143571	yes	AG/GG	1.074	0.978	0.882	1.016	1.01(0.884;1.154)	0.88537	0.0466071	no	0.0559286	no
0	0	127	rs2927261	NA	A/G	0.197	G	0.798	1.112	1.002	1.106	0.945(0.843;1.06)	0.336516	0.0391071	no	0.0469286	no	GG	0.841	1.098	1.004	1.08	0.963(0.844;1.098)	0.575649	0.0425	no	0.051	no	AG/GG	0.38	1.411	0.991	1.585	0.777(0.533;1.132)	0.189405	0.02875	no	0.0345	no
0	0	128	rs4785393	PAPD5	A/G	0.791	G	1.359	0.938	0.815	0.949	1.065(0.957;1.187)	0.249336	0.0367857	no	0.0441429	no	GG	1.261	0.595	0.36	1.481	0.952(0.697;1.301)	0.757752	0.0442857	no	0.0531429	no	AG/GG	1.462	1.013	0.863	0.856	1.11(0.976;1.262)	0.11098	0.0241071	no	0.0289286	no
1	1	129	rs7857137	NA	A/G	0.693	G	0.792	0.91	0.798	1.02	0.865(0.791;0.947)	0.00171796	0.00517857	yes	0.00621429	yes	GG	0.87	0.95	0.8	0.877	0.882(0.737;1.055)	0.169457	0.0289286	no	0.0347143	no	AG/GG	0.697	0.847	0.733	1.11	0.809(0.714;0.916)	0.000801523	0.00196429	yes	0.00235714	yes
0	1	130	rs4771711	NA	A/G	0.532	G	0.809	0.993	1.144	0.83	0.897(0.822;0.978)	0.0141615	0.0125	no	0.015	yes	GG	0.856	1.007	1.193	0.674	0.89(0.77;1.028)	0.111627	0.0258929	no	0.0310714	no	AG/GG	0.665	0.978	1.186	0.887	0.844(0.736;0.969)	0.0162015	0.0103571	no	0.0124286	no
0	0	131	rs12129750	VPS13D	A/G	0.084	G	1.058	0.98	1.104	0.996	1.033(0.891;1.198)	0.666184	0.0464286	no	0.0557143	no	GG	0.966	0.97	1.223	1.021	1.014(0.865;1.189)	0.86302	0.0466071	no	0.0559286	no	AG/GG	6.663	1.12	0.526	0.393	1.138(0.564;2.295)	0.718319	0.0442857	no	0.0531429	no
0	1	132	rs4596036	PREX1	A/G	0.263	G	1.117	0.993	0.859	1.033	1.03(0.937;1.133)	0.542201	0.0442857	no	0.0531429	no	GG	0.996	0.94	0.832	0.982	0.955(0.845;1.079)	0.457442	0.0391071	no	0.0469286	no	AG/GG	1.924	1.14	0.814	1.234	1.347(1.076;1.687)	0.00933027	0.00839286	no	0.0100714	yes
0	0	133	rs10518725	WDR72	A/G	0.192	G	1.362	1.027	0.958	0.752	1.076(0.967;1.196)	0.178657	0.0335714	no	0.0402857	no	GG	1.431	1.082	0.917	0.703	1.084(0.956;1.23)	0.209512	0.03125	no	0.0375	no	AG/GG	1.539	0.846	1.211	0.738	1.099(0.826;1.462)	0.517234	0.0389286	no	0.0467143	no
1	1	134	rs3906146	LMX1B	A/G	0.413	G	1.228	1.313	0.928	0.918	1.127(1.033;1.229)	0.00736939	0.00857143	yes	0.0102857	yes	GG	1.466	1.415	0.923	0.878	1.225(1.074;1.397)	0.00243125	0.00696429	yes	0.00835714	yes	AG/GG	1.118	1.437	0.891	0.918	1.098(0.941;1.28)	0.23474	0.0308929	no	0.0370714	no
0	1	135	rs4751140	EBF3	A/G	0.434	G	1.211	0.953	1.186	1.024	1.103(1.011;1.202)	0.0273261	0.0171429	no	0.0205714	no	GG	1.479	0.924	1.265	0.977	1.208(1.053;1.386)	0.00710268	0.0107143	yes	0.0128571	yes	AG/GG	1.084	0.95	1.203	1.098	1.064(0.92;1.231)	0.403887	0.0367857	no	0.0441429	no
0	0	136	rs12155014	OGDH	A/G	0.926	G	0.902	1.213	1.012	1.156	1.042(0.892;1.217)	0.60514	0.0453571	no	0.0544286	no	GG	4.332	0.67	1.005	2.746	1.623(0.854;3.081)	0.139171	0.0273214	no	0.0327857	no	AG/GG	0.792	1.31	1.013	1.11	1.003(0.847;1.186)	0.976458	0.0492857	no	0.0591429	no
0	1	137	rs10863373	NA	A/C	0.839	C	0.995	0.823	0.856	1.266	0.974(0.869;1.093)	0.657263	0.04625	no	0.0555	no	CC	2.893	1.291	0.893	2.372	1.697(1.187;2.427)	0.00372381	0.00785714	yes	0.00942857	yes	AC/CC	0.879	0.727	0.825	1.233	0.893(0.782;1.019)	0.094071	0.0221429	no	0.0265714	no
0	0	138	rs2604294	NA	A/G	0.234	G	1.326	0.986	0.982	0.952	1.107(1.003;1.221)	0.0434663	0.0210714	no	0.0252857	no	GG	1.433	0.944	0.972	0.932	1.123(0.994;1.27)	0.0634048	0.0214286	no	0.0257143	no	AG/GG	1.338	1.13	0.995	0.98	1.166(0.918;1.481)	0.20851	0.0291071	no	0.0349286	no
1	1	139	rs1280396	CGNL1	A/G	0.197	G	0.745	1.095	0.833	0.73	0.821(0.73;0.922)	0.00090348	0.00339286	yes	0.00407143	yes	GG	0.78	1.035	0.878	0.722	0.832(0.728;0.951)	0.00718224	0.0108929	yes	0.0130714	yes	AG/GG	0.415	1.892	0.502	0.533	0.592(0.415;0.845)	0.00388236	0.00482143	yes	0.00578571	yes
0	1	140	rs10263457	NA	A/G	0.817	G	1.112	1.028	0.724	1.175	1.038(0.928;1.161)	0.515768	0.0439286	no	0.0527143	no	GG	2.622	0.765	1.366	4.437	1.803(1.263;2.572)	0.00115614	0.00482143	yes	0.00578571	yes	AG/GG	1.01	1.079	0.595	1.015	0.953(0.835;1.088)	0.475245	0.0380357	no	0.0456429	no
0	0	141	rs4570560	NA	A/G	0.889	G	1.532	0.851	1.232	0.858	1.123(0.974;1.295)	0.109663	0.0291071	no	0.0349286	no	GG	2.106	0.952	1.385	0.839	1.267(0.731;2.194)	0.398597	0.03625	no	0.0435	no	AG/GG	1.564	0.82	1.246	0.853	1.127(0.965;1.316)	0.132187	0.0266071	no	0.0319286	no
0	0	142	rs8080728	NA	A/G	0.154	G	1.391	0.817	0.932	0.963	1.079(0.962;1.211)	0.194267	0.0351786	no	0.0422143	no	GG	1.42	0.767	0.855	0.964	1.057(0.926;1.206)	0.4133	0.0369643	no	0.0443571	no	AG/GG	1.788	0.987	1.514	0.903	1.349(0.951;1.914)	0.0936394	0.0219643	no	0.0263571	no
0	0	143	rs158807	NA	A/C	0.266	C	1.295	0.856	1.053	0.973	1.073(0.976;1.181)	0.144953	0.0314286	no	0.0377143	no	CC	1.432	0.882	1.1	1.024	1.151(1.017;1.302)	0.0257493	0.0166071	no	0.0199286	no	AC/CC	1.267	0.667	0.967	0.813	0.935(0.753;1.16)	0.539112	0.0398214	no	0.0477857	no
1	1	144	rs923520	NA	A/G	0.7	G	1.231	1.063	0.999	1.369	1.176(1.069;1.294)	0.000903017	0.00321429	yes	0.00385714	yes	GG	1.872	1.051	0.928	1.34	1.335(1.079;1.651)	0.00784026	0.0117857	yes	0.0141429	yes	AG/GG	1.161	1.093	1.023	1.52	1.189(1.051;1.346)	0.00588551	0.00571429	no	0.00685714	yes
0	1	145	rs10957071	TOX	A/G	0.821	G	1.16	1.284	1.142	0.939	1.137(1.009;1.281)	0.0344678	0.0192857	no	0.0231429	no	GG	2.733	1.656	1.88	1.698	2.125(1.415;3.191)	0.000281095	0.00285714	yes	0.00342857	yes	AG/GG	1.072	1.294	1.094	0.88	1.078(0.941;1.234)	0.278189	0.0319643	no	0.0383571	no
0	0	146	rs11005328	ZWINT	A/C	0.006	C	2.46	1	0.742	0.907	1.317(0.872;1.989)	0.190217	0.0346429	no	0.0415714	no	CC	2.695	1	0.738	0.905	1.54(0.926;2.563)	0.0962684	0.0241071	no	0.0289286	no	AC/CC	1.318	1	0.745	0.907	0.955(0.463;1.97)	0.901515	0.0471429	no	0.0565714	no
0	0	147	rs750586	DOCK8	A/G	0.738	G	1.243	0.901	0.839	1.037	1.055(0.951;1.17)	0.312833	0.0380357	no	0.0456429	no	GG	2.01	0.932	0.819	0.795	1.253(0.961;1.634)	0.09542	0.0239286	no	0.0287143	no	AG/GG	1.173	0.871	0.812	1.097	1.024(0.903;1.162)	0.709321	0.0441071	no	0.0529286	no
0	1	148	rs358256	GBA3	A/G	0.204	G	0.896	0.856	1.129	0.884	0.916(0.821;1.023)	0.119505	0.03	no	0.036	no	GG	0.981	0.85	1.17	0.885	0.956(0.84;1.088)	0.49559	0.04	no	0.048	no	AG/GG	0.404	0.679	1.081	0.793	0.612(0.431;0.868)	0.00596349	0.00589286	no	0.00707143	yes
1	1	149	rs3181360	TNFSF8	A/G	0.073	G	0.6	1.018	0.712	1.02	0.782(0.655;0.934)	0.00674751	0.00821429	yes	0.00985714	yes	GG	0.59	1.049	0.693	0.994	0.772(0.638;0.934)	0.00761365	0.0114286	yes	0.0137143	yes	AG/GG	0.5	0.742	0.744	1.478	0.716(0.351;1.462)	0.358845	0.0341071	no	0.0409286	no
0	1	150	rs10510828	FHIT	A/G	0.546	G	0.81	1.06	0.826	0.966	0.896(0.821;0.978)	0.0135395	0.0121429	no	0.0145714	yes	GG	0.859	0.859	0.804	1.084	0.893(0.77;1.035)	0.133332	0.0267857	no	0.0321429	no	AG/GG	0.67	1.328	0.75	0.853	0.837(0.729;0.961)	0.0116007	0.00892857	no	0.0107143	no
0	1	151	rs7207422	ACCN1	A/G	0.72	G	1.342	1.098	0.922	0.97	1.132(1.026;1.249)	0.0131586	0.0117857	no	0.0141429	yes	GG	1.771	1.268	1.089	0.977	1.321(1.046;1.668)	0.0192905	0.0151786	no	0.0182143	no	AG/GG	1.367	1.072	0.861	0.958	1.125(0.994;1.273)	0.0626699	0.0178571	no	0.0214286	no
1	1	152	rs1867102	C9orf3	A/G	0.477	G	1.295	1.144	1.107	1.117	1.195(1.094;1.304)	7.28148e-05	0.00107143	yes	0.00128571	yes	GG	1.396	1.16	1.041	1.112	1.233(1.06;1.434)	0.00668288	0.01	yes	0.012	yes	AG/GG	1.43	1.221	1.231	1.186	1.292(1.127;1.48)	0.000227941	0.000714286	yes	0.000857143	yes
0	0	153	rs7524519	NA	A/G	0.781	G	1.04	0.979	1.089	1.089	1.043(0.937;1.161)	0.438874	0.0416071	no	0.0499286	no	GG	0.483	0.986	0.999	1.658	0.809(0.592;1.105)	0.182501	0.03	no	0.036	no	AG/GG	1.201	0.973	1.133	1.04	1.103(0.972;1.251)	0.12929	0.02625	no	0.0315	no
1	1	154	rs10498342	NA	A/G	0.26	G	1.154	1.098	1.042	1.058	1.105(1.001;1.22)	0.0486274	0.0223214	no	0.0267857	no	GG	1.052	1.147	1.019	0.992	1.055(0.932;1.194)	0.397306	0.0360714	no	0.0432857	no	AG/GG	1.924	0.997	1.191	1.409	1.462(1.144;1.867)	0.00236017	0.00303571	yes	0.00364286	yes
0	0	155	rs1230155	METAP1	A/G	0.696	G	0.833	1.085	0.886	0.987	0.926(0.845;1.016)	0.103057	0.0283929	no	0.0340714	no	GG	0.562	1.289	0.625	1.079	0.813(0.663;0.998)	0.0474085	0.01875	no	0.0225	no	AG/GG	0.891	1.043	0.95	0.951	0.945(0.836;1.07)	0.372982	0.0348214	no	0.0417857	no
0	0	156	rs2043270	FLJ31951	A/G	0.911	G	1.288	0.927	1.014	0.928	1.065(0.915;1.239)	0.414921	0.0410714	no	0.0492857	no	GG	6.933	0.896	2.377	1.28	1.946(0.996;3.803)	0.0513915	0.0192857	no	0.0231429	no	AG/GG	1.211	0.921	0.913	0.898	1.02(0.865;1.203)	0.81415	0.0453571	no	0.0544286	no
1	1	157	rs6657655	LYST	A/G	0.249	G	1.089	1.319	0.977	0.955	1.086(0.982;1.202)	0.107391	0.02875	no	0.0345	no	GG	0.966	1.285	0.921	0.911	1.01(0.893;1.144)	0.868923	0.0473214	no	0.0567857	no	AG/GG	2.009	2.298	1.175	1.107	1.631(1.248;2.131)	0.000338773	0.00107143	yes	0.00128571	yes
0	1	158	rs3024239	WRN	A/G	0.463	G	1.234	1.088	0.942	1	1.104(1.012;1.204)	0.0254562	0.0166071	no	0.0199286	no	GG	1.494	1.314	1.07	1.158	1.314(1.138;1.516)	0.00019134	0.00178571	yes	0.00214286	yes	AG/GG	1.166	0.986	0.795	0.891	1(0.869;1.149)	0.995056	0.0496429	no	0.0595714	no
0	0	159	rs804283	GATA4	A/G	0.667	G	1.264	1.055	1.023	0.959	1.112(1.012;1.222)	0.0272979	0.0169643	no	0.0203571	no	GG	1.13	1.109	1.297	0.881	1.094(0.887;1.349)	0.402442	0.0366071	no	0.0439286	no	AG/GG	1.429	1.059	0.947	0.973	1.162(1.027;1.315)	0.016844	0.0105357	no	0.0126429	no
0	0	160	rs12489296	NA	A/G	0.749	G	0.867	0.972	1.04	1.094	0.957(0.866;1.058)	0.392713	0.0401786	no	0.0482143	no	GG	0.514	0.982	0.77	1.525	0.775(0.6;1.001)	0.0509914	0.0191071	no	0.0229286	no	AG/GG	0.952	0.963	1.144	1.04	0.998(0.881;1.129)	0.969419	0.0491071	no	0.0589286	no
0	0	161	rs1503434	NA	A/G	0.901	G	0.72	1.207	0.919	1.087	0.941(0.829;1.069)	0.350664	0.0394643	no	0.0473571	no	GG	1.223	1.45	0.956	1.955	1.338(0.876;2.043)	0.177779	0.0294643	no	0.0353571	no	AG/GG	0.655	1.214	0.904	1.051	0.896(0.777;1.032)	0.128396	0.0260714	no	0.0312857	no
0	0	162	rs216493	PLEKHA7	A/G	0.164	G	1.102	1.055	1.019	0.965	1.05(0.937;1.178)	0.399368	0.0405357	no	0.0486429	no	GG	0.989	1.039	1.041	0.977	1.005(0.881;1.147)	0.938487	0.0483929	no	0.0580714	no	AG/GG	2.502	1.216	0.909	0.805	1.428(1.009;2.022)	0.0443782	0.0160714	no	0.0192857	no
0	0	163	rs12606250	NA	A/G	0.073	G	1.527	0.907	1.308	0.885	1.16(1.001;1.344)	0.0480132	0.0221429	no	0.0265714	no	GG	1.48	0.877	1.376	0.9	1.147(0.978;1.344)	0.0916138	0.02375	no	0.0285	no	AG/GG	3.984	1.204	1.058	0.414	1.453(0.795;2.654)	0.224569	0.0307143	no	0.0368571	no
1	1	164	rs7656234	SLC4A4	A/G	0.712	G	1.162	1.125	1.096	1.172	1.145(1.041;1.259)	0.00532836	0.00732143	yes	0.00878571	yes	GG	1.934	1.114	0.884	1.656	1.402(1.127;1.742)	0.00237166	0.00678571	yes	0.00814286	yes	AG/GG	1.068	1.186	1.205	1.112	1.122(0.993;1.269)	0.0652115	0.0183929	no	0.0220714	no
1	1	165	rs1822590	NA	A/C	0.277	C	1.309	1.12	1.109	1.19	1.208(1.1;1.327)	7.57182e-05	0.00125	yes	0.0015	yes	CC	1.426	1.223	1.19	1.305	1.317(1.165;1.489)	1.10895e-05	0.000178571	yes	0.000214286	yes	AC/CC	1.357	0.995	1.001	1.118	1.153(0.939;1.417)	0.174299	0.0282143	no	0.0338571	no
0	0	166	rs12121466	NA	A/C	0.828	C	0.785	1.252	0.991	1.055	0.975(0.877;1.084)	0.642411	0.0458929	no	0.0550714	no	CC	1.217	1.182	1.182	0.954	1.132(0.856;1.496)	0.385456	0.0357143	no	0.0428571	no	AC/CC	0.692	1.35	0.952	1.107	0.941(0.828;1.069)	0.347503	0.0339286	no	0.0407143	no
0	1	167	rs10140519	NA	A/G	0.89	G	1.478	0.976	1.283	1.095	1.207(1.048;1.389)	0.00882295	0.00875	no	0.0105	yes	GG	0.977	1.182	1.729	1.052	1.181(0.708;1.969)	0.524861	0.0407143	no	0.0488571	no	AG/GG	1.571	0.944	1.27	1.106	1.233(1.057;1.438)	0.00754788	0.00714286	no	0.00857143	yes
1	1	168	rs11954180	SLC6A7	A/G	0.058	G	1.54	1.214	1.401	1.022	1.312(1.111;1.55)	0.00135087	0.00482143	yes	0.00578571	yes	GG	1.639	1.257	1.512	1.035	1.368(1.147;1.633)	0.000500201	0.00303571	yes	0.00364286	yes	AG/GG	1.002	0.931	0.746	0.684	0.886(0.454;1.729)	0.722251	0.0446429	no	0.0535714	no
1	1	169	rs4647992	NFKB1	A/G	0.057	G	0.566	1	0.871	0.873	0.69(0.541;0.88)	0.00276366	0.00625	yes	0.0075	yes	GG	0.565	1	0.88	0.874	0.685(0.531;0.885)	0.00380366	0.00803571	yes	0.00964286	yes	AG/GG	0.349	1	0.745	1.063	0.638(0.238;1.709)	0.370952	0.0344643	no	0.0413571	no
0	0	170	rs924584	NA	A/G	0.326	G	0.758	0.987	1.088	1.118	0.915(0.831;1.008)	0.0723729	0.0253571	no	0.0304286	no	GG	0.701	0.993	1.05	1.158	0.893(0.789;1.01)	0.0712271	0.0219643	no	0.0263571	no	AG/GG	0.701	0.954	1.464	1.11	0.901(0.717;1.132)	0.371071	0.0346429	no	0.0415714	no
0	1	171	rs933664	NA	A/C	0.694	C	0.763	0.981	0.928	1.032	0.887(0.809;0.972)	0.0101116	0.00982143	no	0.0117857	yes	CC	0.624	0.858	0.771	0.965	0.763(0.626;0.93)	0.00731915	0.01125	yes	0.0135	yes	AC/CC	0.741	1.025	0.952	1.079	0.894(0.789;1.012)	0.0765535	0.0191071	no	0.0229286	no
0	0	172	rs9916344	PITPNM3	A/G	0.516	G	0.843	1.027	0.853	1.074	0.928(0.851;1.012)	0.0928263	0.0276786	no	0.0332143	no	GG	0.946	1.039	0.844	1.012	0.958(0.824;1.113)	0.570777	0.0423214	no	0.0507857	no	AG/GG	0.665	1.034	0.784	1.192	0.87(0.76;0.996)	0.0428586	0.0153571	no	0.0184286	no
0	0	173	rs10511330	ZBTB20	A/G	0.86	G	1.152	1.089	1.123	1.343	1.164(1.027;1.319)	0.0174849	0.0144643	no	0.0173571	no	GG	3.657	0.764	1.349	2.096	1.531(0.979;2.394)	0.0619133	0.02125	no	0.0255	no	AG/GG	1.072	1.167	1.113	1.352	1.151(1;1.325)	0.0501452	0.0169643	no	0.0203571	no
0	0	174	rs3886917	NA	A/G	0.711	G	0.831	1.001	1.042	0.986	0.929(0.846;1.02)	0.121859	0.0303571	no	0.0364286	no	GG	0.556	0.769	1.281	1.059	0.782(0.633;0.966)	0.0226274	0.01625	no	0.0195	no	AG/GG	0.889	1.098	0.983	0.962	0.963(0.851;1.089)	0.544384	0.04	no	0.048	no
0	0	175	rs11153598	NT5DC1	A/C	0.152	C	0.939	1.023	0.886	0.97	0.956(0.848;1.078)	0.461728	0.0428571	no	0.0514286	no	CC	1.034	0.964	0.862	1.014	0.986(0.861;1.129)	0.839638	0.0455357	no	0.0546429	no	AC/CC	0.317	1.576	0.931	0.469	0.693(0.451;1.065)	0.0943464	0.0223214	no	0.0267857	no
1	1	176	rs567971	NA	A/G	0.173	G	1.324	1.218	0.813	1.224	1.191(1.071;1.325)	0.00123273	0.00428571	yes	0.00514286	yes	GG	1.446	1.369	0.756	1.278	1.267(1.116;1.439)	0.000265105	0.0025	yes	0.003	yes	AG/GG	1.121	0.951	0.961	1.258	1.07(0.804;1.424)	0.641663	0.0417857	no	0.0501429	no
0	0	177	rs303006	NA	A/G	0.178	G	0.762	0.997	1.022	0.915	0.88(0.783;0.99)	0.0336352	0.0185714	no	0.0222857	no	GG	0.8	0.929	1.019	0.959	0.889(0.777;1.017)	0.0873854	0.0230357	no	0.0276429	no	AG/GG	0.378	1.572	1.068	0.494	0.701(0.479;1.026)	0.0675912	0.0185714	no	0.0222857	no
0	0	178	rs2901840	NA	A/C	0.126	C	0.829	0.977	1.218	1.235	0.994(0.87;1.134)	0.925816	0.0491071	no	0.0589286	no	CC	0.907	1.019	1.144	1.242	1.029(0.888;1.193)	0.703161	0.0433929	no	0.0520714	no	AC/CC	0.317	0.529	2.295	1.444	0.729(0.457;1.163)	0.18444	0.0283929	no	0.0340714	no
0	0	179	rs1898422	LRP1B	A/C	0.202	C	0.737	1.182	1.055	1.021	0.928(0.83;1.039)	0.194925	0.0353571	no	0.0424286	no	CC	0.687	1.144	1.02	0.991	0.883(0.775;1.006)	0.0617911	0.0208929	no	0.0250714	no	AC/CC	0.777	1.632	1.299	1.267	1.151(0.826;1.604)	0.406556	0.0369643	no	0.0443571	no
0	0	180	rs10055012	SEMA6A	A/C	0.833	C	0.836	0.924	0.925	1.071	0.913(0.815;1.024)	0.119356	0.0298214	no	0.0357857	no	CC	0.393	0.808	0.816	1.216	0.661(0.456;0.957)	0.0281877	0.0173214	no	0.0207857	no	AC/CC	0.897	0.926	0.927	1.067	0.941(0.825;1.073)	0.364482	0.0342857	no	0.0411429	no
0	0	181	rs1005321	HS3ST3B1	A/G	0.542	G	0.858	0.99	1.007	1.062	0.947(0.867;1.033)	0.218632	0.0360714	no	0.0432857	no	GG	1.014	0.927	1.022	1.111	1.008(0.876;1.161)	0.910301	0.0476786	no	0.0572143	no	AG/GG	0.678	1.075	0.996	1.054	0.863(0.751;0.992)	0.0384387	0.0146429	no	0.0175714	no
1	1	182	rs4918255	SORCS1	A/G	0.665	G	1.265	1.103	1.18	1.238	1.212(1.101;1.333)	8.80863e-05	0.00142857	yes	0.00171429	yes	GG	1.803	1.27	1.693	1.594	1.644(1.306;2.069)	2.29369e-05	0.000357143	yes	0.000428571	yes	AG/GG	1.232	1.105	1.116	1.233	1.184(1.047;1.34)	0.0073286	0.00678571	no	0.00814286	yes
0	0	183	rs3782415	SOCS2	A/G	0.834	G	0.728	1.261	1.129	0.784	0.884(0.79;0.99)	0.0323938	0.0183929	no	0.0220714	no	GG	0.428	1.246	1.373	0.547	0.704(0.494;1.004)	0.0525553	0.0196429	no	0.0235714	no	AG/GG	0.722	1.313	1.115	0.79	0.891(0.782;1.014)	0.0802926	0.0201786	no	0.0242143	no
0	1	184	rs7127390	IGSF4	A/G	0.794	G	1.127	1.035	1.375	1.107	1.133(1.017;1.263)	0.0240394	0.0160714	no	0.0192857	no	GG	2.232	1.486	1.833	0.993	1.689(1.251;2.28)	0.000619746	0.00410714	yes	0.00492857	yes	AG/GG	1.018	0.96	1.386	1.156	1.078(0.948;1.226)	0.249632	0.0314286	no	0.0377143	no
0	0	185	rs954472	NA	A/G	0.165	G	0.881	1.051	1.107	1.005	0.975(0.867;1.097)	0.675388	0.0467857	no	0.0561429	no	GG	0.955	1.081	1.072	1.036	1.016(0.888;1.162)	0.818418	0.0453571	no	0.0544286	no	AG/GG	0.342	0.948	1.663	0.799	0.714(0.49;1.042)	0.0807715	0.0203571	no	0.0244286	no
0	0	186	rs262883	DOCK2	A/G	0.221	G	0.856	0.998	1.103	0.9	0.931(0.837;1.036)	0.190732	0.0348214	no	0.0417857	no	GG	0.922	0.972	1.215	0.891	0.966(0.851;1.096)	0.587681	0.0426786	no	0.0512143	no	AG/GG	0.433	1.229	0.786	0.841	0.677(0.491;0.932)	0.0169455	0.0107143	no	0.0128571	no
1	1	187	rs1463990	NA	A/G	0.776	G	0.867	1.004	0.852	0.8	0.877(0.792;0.971)	0.0115745	0.0110714	no	0.0132857	yes	GG	1.479	1.077	0.894	0.63	1.049(0.801;1.374)	0.727305	0.04375	no	0.0525	no	AG/GG	0.745	0.992	0.808	0.796	0.815(0.72;0.923)	0.00129263	0.00214286	yes	0.00257143	yes
0	0	188	rs11189119	NA	A/G	0.097	G	0.644	1	0.92	1.485	0.861(0.719;1.032)	0.104964	0.0285714	no	0.0342857	no	GG	0.645	1	0.909	1.584	0.864(0.711;1.05)	0.141193	0.0276786	no	0.0332143	no	AG/GG	0.217	1	0.987	0.73	0.615(0.273;1.385)	0.240416	0.0310714	no	0.0372857	no
0	0	189	rs882696	TUSC3	A/G	0.148	G	0.791	1.222	0.923	1.168	0.983(0.871;1.111)	0.787358	0.0473214	no	0.0567857	no	GG	0.847	1.226	0.934	1.199	1.012(0.881;1.163)	0.863497	0.0467857	no	0.0561429	no	AG/GG	0.343	1.506	0.736	1.291	0.82(0.558;1.206)	0.314116	0.0326786	no	0.0392143	no
0	0	190	rs6104550	NA	A/G	0.705	G	1.204	0.974	0.922	0.955	1.049(0.954;1.154)	0.323117	0.0383929	no	0.0460714	no	GG	1.861	1	0.918	0.882	1.215(0.977;1.512)	0.0802136	0.0228571	no	0.0274286	no	AG/GG	1.123	0.955	0.899	0.967	1.016(0.899;1.148)	0.803311	0.0451786	no	0.0542143	no
0	0	191	rs1189843	NA	A/G	0.198	G	1.35	0.994	0.746	0.888	1.055(0.952;1.169)	0.308562	0.0375	no	0.045	no	GG	1.424	1.009	0.67	0.896	1.069(0.944;1.212)	0.293811	0.0339286	no	0.0407143	no	AG/GG	1.43	0.921	0.883	0.726	1.052(0.811;1.363)	0.703621	0.0439286	no	0.0527143	no
0	0	192	rs1796412	NA	A/G	0.811	G	0.741	0.998	1.184	0.905	0.884(0.793;0.984)	0.0246741	0.0164286	no	0.0197143	no	GG	0.716	1.207	1.274	0.678	0.872(0.649;1.173)	0.365111	0.0353571	no	0.0424286	no	AG/GG	0.697	0.969	1.208	0.928	0.863(0.76;0.981)	0.023794	0.0125	no	0.015	no
0	0	193	rs2277509	NA	A/C	0.698	C	0.938	1.088	0.948	0.827	0.949(0.865;1.042)	0.272601	0.0369643	no	0.0443571	no	CC	1.47	1.201	1.062	0.649	1.128(0.921;1.381)	0.245411	0.0323214	no	0.0387857	no	AC/CC	0.783	1.084	0.896	0.847	0.874(0.773;0.989)	0.0320979	0.0141071	no	0.0169286	no
0	0	194	rs2304965	NA	A/G	0.362	G	1.138	0.997	1.21	0.981	1.082(0.989;1.185)	0.0866887	0.0269643	no	0.0323571	no	GG	1.006	0.965	1.315	1.035	1.041(0.919;1.179)	0.526618	0.0408929	no	0.0490714	no	AG/GG	1.641	1.084	1.222	0.858	1.262(1.049;1.518)	0.0135794	0.00928571	no	0.0111429	no
0	0	195	rs12353067	NA	A/G	0.232	G	0.804	0.867	0.816	1.15	0.884(0.796;0.982)	0.021288	0.0157143	no	0.0188571	no	GG	0.851	0.814	0.746	1.248	0.892(0.787;1.013)	0.077527	0.0225	no	0.027	no	AG/GG	0.468	1.038	1.019	0.941	0.717(0.534;0.963)	0.0271387	0.0132143	no	0.0158571	no
0	0	196	rs1922263	CHST11	A/C	0.121	C	0.857	1.066	1.23	1.121	1.001(0.874;1.147)	0.988079	0.0498214	no	0.0597857	no	CC	0.925	1.061	1.237	1.096	1.029(0.885;1.195)	0.712008	0.0435714	no	0.0522857	no	AC/CC	0.258	1.241	1.494	1.672	0.789(0.46;1.356)	0.391641	0.0358929	no	0.0430714	no
1	1	197	rs12621193	NA	A/G	0.154	G	0.696	1.067	0.782	0.907	0.831(0.734;0.941)	0.00357938	0.00678571	yes	0.00814286	yes	GG	0.67	1.05	0.737	0.87	0.801(0.696;0.92)	0.00178517	0.00607143	yes	0.00728571	yes	AG/GG	0.62	1.291	0.892	1.332	0.919(0.616;1.373)	0.680953	0.0433929	no	0.0520714	no
0	1	198	rs2722222	NA	A/G	0.812	G	1.189	1.156	1.033	0.837	1.082(0.966;1.211)	0.17384	0.0332143	no	0.0398571	no	GG	2.476	1.446	1.1	1.424	1.735(1.208;2.491)	0.00283829	0.00714286	yes	0.00857143	yes	AG/GG	1.103	1.155	1.03	0.783	1.029(0.903;1.172)	0.6661	0.0428571	no	0.0514286	no
0	0	199	rs4497194	NA	A/G	0.895	G	1.258	1.059	1.049	1.194	1.158(1.003;1.337)	0.0451409	0.0214286	no	0.0257143	no	GG	5.418	1.132	0.805	0.539	1.352(0.754;2.425)	0.310965	0.0341071	no	0.0409286	no	AG/GG	1.189	1.056	1.078	1.268	1.151(0.984;1.345)	0.0784012	0.0198214	no	0.0237857	no
0	0	200	rs10512392	EPB41L4B	A/G	0.305	G	0.845	1.046	1.091	1.127	0.974(0.883;1.074)	0.596299	0.045	no	0.054	no	GG	0.913	1.018	1.12	1.152	1.011(0.894;1.144)	0.86056	0.0464286	no	0.0557143	no	AG/GG	0.545	1.293	1.124	1.165	0.818(0.642;1.041)	0.102162	0.0233929	no	0.0280714	no
0	1	201	rs12341685	TMEM2	A/G	0.91	G	0.994	1.13	1.076	1.162	1.069(0.921;1.24)	0.380734	0.04	no	0.048	no	GG	5.41	1.558	1.799	4.495	2.513(1.287;4.906)	0.00694404	0.0103571	yes	0.0124286	yes	AG/GG	0.9	1.112	1.044	1.111	1.01(0.86;1.185)	0.905968	0.0473214	no	0.0567857	no
0	0	202	rs1377843	DZIP3	A/G	0.873	G	0.74	0.958	0.953	1.351	0.927(0.822;1.045)	0.216121	0.0358929	no	0.0430714	no	GG	1.076	1.14	0.615	2.685	1.171(0.799;1.716)	0.418859	0.0375	no	0.045	no	AG/GG	0.678	0.923	1.016	1.309	0.885(0.771;1.015)	0.0814702	0.0207143	no	0.0248571	no
0	1	203	rs4952085	XDH	A/G	0.744	G	1.252	0.952	1.078	0.996	1.101(0.993;1.221)	0.0678637	0.0248214	no	0.0297857	no	GG	1.995	0.984	1.109	1.714	1.541(1.171;2.028)	0.00204374	0.00625	yes	0.0075	yes	AG/GG	1.187	0.936	1.092	0.898	1.05(0.926;1.19)	0.445056	0.0376786	no	0.0452143	no
0	0	204	rs9378384	NA	A/C	0.759	C	1.233	0.801	0.853	1.109	1.042(0.937;1.159)	0.451455	0.0423214	no	0.0507857	no	CC	0.785	0.759	0.57	1.639	0.839(0.619;1.138)	0.259271	0.0326786	no	0.0392143	no	AC/CC	1.413	0.772	0.892	1.067	1.092(0.962;1.24)	0.173411	0.0280357	no	0.0336429	no
0	1	205	rs2660342	LOC285429	A/G	0.174	G	1.23	0.975	0.752	1.361	1.107(0.995;1.232)	0.0629499	0.0239286	no	0.0287143	no	GG	1.402	0.957	0.768	1.475	1.185(1.042;1.346)	0.00943936	0.0125	yes	0.015	yes	AG/GG	0.715	1.024	0.449	1.298	0.864(0.641;1.163)	0.334517	0.03375	no	0.0405	no
1	1	206	rs4240673	XKR6	A/G	0.411	G	1.278	1.045	1.223	0.979	1.147(1.051;1.252)	0.00201932	0.00607143	yes	0.00728571	yes	GG	1.459	1.123	1.38	1.002	1.264(1.105;1.446)	0.000626213	0.00428571	yes	0.00514286	yes	AG/GG	1.305	1.001	1.202	0.935	1.121(0.964;1.302)	0.138352	0.0269643	no	0.0323571	no
0	0	207	rs4237774	OR56A1	A/G	0.652	G	1.176	1.042	0.966	1.161	1.109(1.01;1.217)	0.0293981	0.0176786	no	0.0212143	no	GG	1.714	0.901	0.907	1.007	1.209(0.991;1.475)	0.0617104	0.0207143	no	0.0248571	no	AG/GG	1.077	1.124	0.979	1.269	1.11(0.982;1.256)	0.0957092	0.0226786	no	0.0272143	no
1	1	208	rs8073559	NA	A/G	0.189	G	1.314	1.085	1.187	1.144	1.205(1.083;1.341)	0.000614728	0.00285714	yes	0.00342857	yes	GG	1.432	1.168	1.211	1.141	1.271(1.12;1.442)	0.000195915	0.00196429	yes	0.00235714	yes	AG/GG	1.168	0.81	1.357	1.273	1.118(0.84;1.489)	0.44386	0.0375	no	0.045	no
0	0	209	rs1550765	NA	A/G	0.791	G	0.856	0.897	1.038	1.063	0.928(0.834;1.033)	0.173723	0.0330357	no	0.0396429	no	GG	0.462	0.864	0.728	1.327	0.685(0.498;0.942)	0.0198581	0.0157143	no	0.0188571	no	AG/GG	0.925	0.88	1.12	1.037	0.962(0.847;1.092)	0.548477	0.0403571	no	0.0484286	no
0	1	210	rs2331101	NA	A/G	0.235	G	1.147	1.203	1.172	0.972	1.125(1.019;1.243)	0.0196157	0.0153571	no	0.0184286	no	GG	1.339	1.262	1.205	0.923	1.206(1.066;1.365)	0.00293196	0.00732143	yes	0.00878571	yes	AG/GG	0.689	1.258	1.263	1.127	0.979(0.764;1.256)	0.868486	0.04625	no	0.0555	no
0	1	211	rs1395451	NA	A/C	0.897	C	1.189	1.137	0.899	0.893	1.058(0.918;1.219)	0.436626	0.0414286	no	0.0497143	no	CC	4.18	2.721	0.667	1.775	2.395(1.309;4.382)	0.00460059	0.00857143	yes	0.0102857	yes	AC/CC	1.095	1.078	0.902	0.822	0.996(0.853;1.164)	0.96273	0.0489286	no	0.0587143	no
0	1	212	rs346119	NA	A/G	0.47	G	0.802	1.004	1.082	0.872	0.897(0.823;0.979)	0.0145707	0.0126786	no	0.0152143	yes	GG	0.823	1.078	1.087	0.83	0.913(0.799;1.043)	0.178523	0.0298214	no	0.0357857	no	AG/GG	0.646	0.925	1.145	0.846	0.808(0.692;0.944)	0.00719877	0.00642857	no	0.00771429	yes
0	0	213	rs2269475	AIF1	A/G	0.144	G	0.695	1	1.148	1.153	0.877(0.756;1.017)	0.0826913	0.0266071	no	0.0319286	no	GG	0.666	1	1.121	1.214	0.855(0.724;1.01)	0.0646939	0.0217857	no	0.0261429	no	AG/GG	0.622	1	1.691	0.809	0.859(0.497;1.483)	0.58542	0.0408929	no	0.0490714	no
0	1	214	rs6946852	MEOX2	A/G	0.639	G	1.192	0.972	1.056	1.107	1.098(1.003;1.201)	0.0419902	0.0205357	no	0.0246429	no	GG	1.715	0.913	1.06	1.534	1.283(1.073;1.534)	0.00617419	0.00964286	yes	0.0115714	yes	AG/GG	1.115	1.001	1.08	0.983	1.057(0.931;1.199)	0.390976	0.0357143	no	0.0428571	no
0	0	215	rs2543356	NA	A/G	0.867	G	0.767	0.969	0.783	1.169	0.875(0.772;0.992)	0.036903	0.0196429	no	0.0235714	no	GG	0.36	0.574	0.888	1.898	0.604(0.387;0.941)	0.0258813	0.0167857	no	0.0201429	no	AG/GG	0.807	1.017	0.742	1.149	0.899(0.782;1.035)	0.137858	0.0267857	no	0.0321429	no
0	1	216	rs2596230	RYR3	A/G	0.876	G	1.207	0.931	1.359	0.909	1.095(0.957;1.255)	0.187608	0.0344643	no	0.0413571	no	GG	4.175	2.755	3.099	0.893	2.789(1.611;4.829)	0.000250709	0.00232143	yes	0.00278571	yes	AG/GG	1.135	0.805	1.278	0.899	1.019(0.878;1.182)	0.802641	0.045	no	0.054	no
0	1	217	rs1581035	NA	A/G	0.501	G	1.188	1.102	1.116	0.967	1.108(1.016;1.208)	0.0202167	0.0155357	no	0.0186429	no	GG	1.506	1.149	1.161	1.054	1.267(1.095;1.466)	0.00149919	0.00535714	yes	0.00642857	yes	AG/GG	1.07	1.134	1.15	0.875	1.05(0.914;1.205)	0.491791	0.0385714	no	0.0462857	no
1	1	218	rs4729049	CDK6	A/G	0.889	G	1.357	1.17	1.132	1.085	1.217(1.056;1.401)	0.00651327	0.00785714	yes	0.00942857	yes	GG	4.645	1.551	1.152	1.911	1.983(1.134;3.468)	0.0163945	0.0141071	no	0.0169286	yes	AG/GG	1.292	1.163	1.143	1.051	1.187(1.017;1.386)	0.0297329	0.0135714	no	0.0162857	no
0	0	219	rs3769583	FLJ20272	A/G	0.223	G	0.765	1.005	0.926	0.962	0.876(0.785;0.977)	0.0173142	0.0142857	no	0.0171429	no	GG	0.791	0.982	0.867	1.01	0.885(0.778;1.006)	0.0614871	0.0205357	no	0.0246429	no	AG/GG	0.442	1.176	1.255	0.63	0.691(0.497;0.96)	0.0276626	0.0133929	no	0.0160714	no
0	0	220	rs12043001	NA	A/G	0.872	G	0.838	1.018	0.994	0.931	0.926(0.823;1.043)	0.204435	0.0355357	no	0.0426429	no	GG	0.337	1.004	0.837	1.834	0.784(0.533;1.153)	0.215768	0.0314286	no	0.0377143	no	AG/GG	0.905	1.025	1.012	0.865	0.941(0.821;1.078)	0.379465	0.0351786	no	0.0422143	no
0	0	221	rs11943045	NA	A/G	0.894	G	1.258	1.066	0.71	0.912	1.04(0.896;1.208)	0.604448	0.0451786	no	0.0542143	no	GG	4.17	0.893	0.732	2.195	1.009(0.709;1.437)	0.959379	0.0489286	no	0.0587143	no	AG/GG	1.172	1.088	0.294	0.844	1.042(0.874;1.243)	0.645399	0.0419643	no	0.0503571	no
0	0	222	rs894558	NAV2	A/G	0.089	G	0.887	0.844	1.209	0.993	0.943(0.813;1.093)	0.435688	0.04125	no	0.0495	no	GG	0.985	0.853	1.622	0.933	0.942(0.792;1.121)	0.50395	0.0401786	no	0.0482143	no	AG/GG	0.24	0.647	1.192	2.3	0.971(0.692;1.361)	0.86379	0.0460714	no	0.0552857	no
0	0	223	rs2075773	ANGEL1	A/C	0.878	C	1.489	0.997	1.281	0.757	1.145(0.993;1.32)	0.0633148	0.0241071	no	0.0289286	no	CC	2.162	1.685	1.811	0.587	1.349(0.819;2.222)	0.240371	0.0321429	no	0.0385714	no	AC/CC	1.507	0.955	1.252	0.744	1.155(0.985;1.355)	0.0761328	0.0189286	no	0.0227143	no
0	0	224	rs13125710	NA	A/G	0.072	G	1.489	0.983	1.052	0.77	1.128(0.968;1.315)	0.122583	0.0305357	no	0.0366429	no	GG	1.567	1.019	1.015	0.722	1.145(0.971;1.351)	0.107492	0.0251786	no	0.0302143	no	AG/GG	1.168	0.618	1.871	3.842	1.148(0.581;2.269)	0.690958	0.0435714	no	0.0522857	no
0	0	225	rs2158860	NA	A/G	0.867	G	0.736	0.972	1.115	1.162	0.916(0.811;1.035)	0.159846	0.0323214	no	0.0387857	no	GG	0.911	0.978	0.857	2.164	1.049(0.72;1.528)	0.802128	0.0451786	no	0.0542143	no	AG/GG	0.681	0.967	1.187	1.114	0.888(0.774;1.019)	0.0917643	0.0214286	no	0.0257143	no
0	0	226	rs1490813	NA	A/G	0.56	G	0.84	1.044	0.946	0.888	0.907(0.831;0.992)	0.0317732	0.0182143	no	0.0218571	no	GG	0.654	1.229	0.91	0.866	0.832(0.712;0.971)	0.0197976	0.0155357	no	0.0186429	no	AG/GG	0.922	0.962	0.951	0.855	0.92(0.805;1.051)	0.221655	0.0305357	no	0.0366429	no
0	0	227	rs922943	NA	A/G	0.468	G	0.839	1.109	0.855	0.998	0.93(0.852;1.014)	0.101521	0.0278571	no	0.0334286	no	GG	0.921	1.191	0.888	0.995	0.976(0.851;1.121)	0.734557	0.0441071	no	0.0529286	no	AG/GG	0.655	1.113	0.723	1.003	0.841(0.728;0.972)	0.019218	0.0114286	no	0.0137143	no
0	0	228	rs249904	PPP2R2B	A/G	0.306	G	1.291	1.004	0.98	0.987	1.107(1.01;1.213)	0.0300757	0.0180357	no	0.0216429	no	GG	1.42	0.918	0.978	1.049	1.145(1.011;1.296)	0.0325332	0.0176786	no	0.0212143	no	AG/GG	1.339	1.189	0.967	0.816	1.129(0.931;1.37)	0.217669	0.0301786	no	0.0362143	no
1	1	229	rs8003056	NA	A/G	0.861	G	1.455	1.057	1.09	1.363	1.278(1.114;1.466)	0.000446422	0.00232143	yes	0.00278571	yes	GG	1.454	0.667	0.762	2.116	1.217(0.758;1.954)	0.41557	0.0371429	no	0.0445714	no	AG/GG	1.515	1.099	1.141	1.351	1.318(1.134;1.531)	0.000324592	0.000892857	yes	0.00107143	yes
1	1	230	rs2032563	CAMTA1	A/G	0.185	G	1.298	1.012	0.988	1.214	1.161(1.043;1.293)	0.00651472	0.00803571	yes	0.00964286	yes	GG	1.431	1.061	1.001	1.283	1.24(1.092;1.408)	0.000919528	0.00446429	yes	0.00535714	yes	AG/GG	1.055	0.801	0.915	1.156	0.985(0.736;1.318)	0.918136	0.0482143	no	0.0578571	no
0	1	231	rs9304496	KCTD1	A/G	0.714	G	1.26	1.022	1.037	0.968	1.106(1.002;1.221)	0.0459379	0.0216071	no	0.0259286	no	GG	1.962	1.071	1.536	0.893	1.386(1.074;1.788)	0.0121889	0.0132143	yes	0.0158571	yes	AG/GG	1.221	1.019	0.956	0.985	1.082(0.956;1.224)	0.211282	0.0296429	no	0.0355714	no
0	0	232	rs7677714	NA	A/G	0.132	G	1.103	0.915	1.084	1.24	1.074(0.951;1.214)	0.248144	0.0364286	no	0.0437143	no	GG	1.009	0.884	1.148	1.201	1.031(0.899;1.183)	0.661484	0.0432143	no	0.0518571	no	AG/GG	3.228	1.086	0.737	2.355	1.713(1.093;2.686)	0.0189211	0.01125	no	0.0135	no
0	1	233	rs723525	CTNNA2	A/G	0.734	G	1.177	0.873	1.283	1.239	1.124(1.016;1.243)	0.0230469	0.0158929	no	0.0190714	no	GG	1.973	0.755	1.595	1.255	1.405(1.086;1.817)	0.00964873	0.0126786	yes	0.0152143	yes	AG/GG	1.092	0.87	1.298	1.312	1.103(0.975;1.248)	0.119663	0.0248214	no	0.0297857	no
0	0	234	rs2201186	NA	A/G	0.735	G	0.76	1.032	1.01	0.996	0.898(0.816;0.988)	0.027358	0.0173214	no	0.0207857	no	GG	0.584	1.072	0.816	1.163	0.807(0.646;1.008)	0.0587223	0.0201786	no	0.0242143	no	AG/GG	0.756	1.031	1.087	0.955	0.899(0.795;1.015)	0.086087	0.0208929	no	0.0250714	no
0	1	235	rs2553377	NA	A/C	0.189	C	0.724	0.97	1.043	0.921	0.855(0.76;0.962)	0.00921116	0.00910714	no	0.0109286	yes	CC	0.739	0.932	1.005	0.959	0.859(0.751;0.982)	0.0262522	0.0169643	no	0.0203571	no	AC/CC	0.376	1.269	1.691	0.621	0.673(0.454;0.997)	0.0480868	0.01625	no	0.0195	no
0	0	236	rs1076584	VASH1	A/G	0.121	G	0.673	1.039	0.791	1.32	0.878(0.761;1.014)	0.0765404	0.0260714	no	0.0312857	no	GG	0.665	1.085	0.813	1.355	0.878(0.749;1.029)	0.107971	0.0253571	no	0.0304286	no	AG/GG	0.463	0.556	0.55	1.678	0.74(0.446;1.228)	0.244222	0.03125	no	0.0375	no
0	0	237	rs2232548	KLRF1	A/C	0.087	C	1.142	0.986	1.141	0.897	1.061(0.909;1.239)	0.450264	0.0421429	no	0.0505714	no	CC	1.057	0.975	1.167	0.863	1.016(0.861;1.2)	0.848461	0.0457143	no	0.0548571	no	AC/CC	5.051	1.12	0.994	2.605	1.992(0.964;4.114)	0.0627053	0.0180357	no	0.0216429	no
0	1	238	rs3816754	RAD51L3	A/C	0.04	C	1.634	1	0.891	1.27	1.329(1.071;1.65)	0.00981479	0.00946429	no	0.0113571	yes	CC	1.719	1	0.897	1.239	1.368(1.088;1.719)	0.00722454	0.0110714	yes	0.0132857	yes	AC/CC	0.88	1	0.739	2.596	1.112(0.458;2.701)	0.814205	0.0455357	no	0.0546429	no
0	1	239	rs9324976	NA	A/C	0.808	C	1.16	0.884	1.276	0.863	1.045(0.933;1.172)	0.445343	0.0417857	no	0.0501429	no	CC	2.415	0.88	1.495	1.289	1.59(1.124;2.249)	0.00884347	0.0121429	yes	0.0145714	yes	AC/CC	1.07	0.868	1.305	0.775	0.987(0.865;1.127)	0.851044	0.0458929	no	0.0550714	no
0	0	240	rs10229977	NA	A/G	0.974	G	0.564	1	0.988	1.143	0.793(0.619;1.017)	0.0677343	0.0246429	no	0.0295714	no	GG	1.141	1	1.348	1.199	1.15(0.471;2.81)	0.758664	0.0444643	no	0.0533571	no	AG/GG	0.533	1	0.963	1.165	0.76(0.583;0.992)	0.0436927	0.0158929	no	0.0190714	no
0	1	241	rs6991271	KIF13B	A/C	0.419	C	0.868	1.032	1.114	0.865	0.936(0.856;1.022)	0.141742	0.0310714	no	0.0372857	no	CC	0.982	1.014	1.148	0.926	1(0.881;1.136)	0.994626	0.05	no	0.06	no	AC/CC	0.636	1.093	1.145	0.697	0.797(0.675;0.94)	0.00695286	0.00625	no	0.0075	yes
0	1	242	rs2738679	WWOX	A/G	0.7	G	1.217	1	1.101	1.108	1.124(1.02;1.238)	0.0181332	0.0146429	no	0.0175714	no	GG	1.84	1.213	1.802	1.587	1.6(1.27;2.017)	6.84981e-05	0.00107143	yes	0.00128571	yes	AG/GG	1.148	0.94	1.009	1.033	1.053(0.932;1.19)	0.409173	0.0371429	no	0.0445714	no
0	0	243	rs1812736	NA	A/G	0.827	G	0.868	1.049	0.845	1.436	0.993(0.886;1.113)	0.901191	0.04875	no	0.0585	no	GG	0.351	1.491	0.62	1.353	0.712(0.473;1.073)	0.104336	0.025	no	0.03	no	AG/GG	0.922	1.028	0.867	1.518	1.032(0.905;1.177)	0.640479	0.0416071	no	0.0499286	no
0	1	244	rs15606	NA	A/G	0.576	G	1.217	0.939	1.084	1.148	1.115(1.02;1.219)	0.0165231	0.0135714	no	0.0162857	no	GG	1.58	0.923	1.074	1.556	1.324(1.113;1.576)	0.00157079	0.00571429	yes	0.00685714	yes	AG/GG	1.145	0.922	1.131	1.063	1.069(0.943;1.212)	0.298952	0.0323214	no	0.0387857	no
0	0	245	rs7505612	NA	A/C	0.312	C	0.758	1.102	1.09	0.972	0.916(0.832;1.009)	0.0763639	0.0258929	no	0.0310714	no	CC	0.737	1.117	1.026	0.959	0.899(0.795;1.017)	0.0899243	0.0235714	no	0.0282857	no	AC/CC	0.618	1.172	1.394	0.998	0.893(0.713;1.118)	0.322911	0.0330357	no	0.0396429	no
0	0	246	rs1517598	PROM1	A/G	0.889	G	0.7	1.197	0.999	1.203	0.944(0.833;1.07)	0.367996	0.0398214	no	0.0477857	no	GG	0.481	0.558	0.659	1.591	0.711(0.444;1.139)	0.156048	0.0283929	no	0.0340714	no	AG/GG	0.686	1.313	1.049	1.201	0.961(0.836;1.106)	0.581168	0.0407143	no	0.0488571	no
0	0	247	rs524533	NFKBIE	A/G	0.713	G	0.778	0.896	1.299	1.007	0.911(0.828;1.002)	0.0538987	0.0228571	no	0.0274286	no	GG	0.561	1.104	1.352	0.936	0.843(0.681;1.044)	0.117657	0.0264286	no	0.0317143	no	AG/GG	0.786	0.804	1.393	1.035	0.909(0.804;1.027)	0.126199	0.0255357	no	0.0306429	no
0	0	248	rs2660885	NA	A/G	0.176	G	1.102	0.894	1.108	0.813	0.993(0.886;1.113)	0.90194	0.0489286	no	0.0587143	no	GG	1.001	0.875	1.127	0.809	0.945(0.83;1.077)	0.394959	0.0358929	no	0.0430714	no	AG/GG	2.446	0.904	1.125	0.649	1.327(0.929;1.895)	0.12019	0.025	no	0.03	no
0	0	249	rs7319813	PIG38	A/G	0.853	G	0.723	1.05	1.123	1.118	0.922(0.821;1.034)	0.163432	0.0326786	no	0.0392143	no	GG	0.532	1.856	1.032	2.309	1.049(0.747;1.473)	0.783717	0.0448214	no	0.0537857	no	AG/GG	0.719	0.97	1.16	1.021	0.889(0.778;1.015)	0.0810026	0.0205357	no	0.0246429	no
0	1	250	rs4541274	CTNNA2	A/G	0.646	G	0.843	0.939	1.022	1.016	0.924(0.845;1.01)	0.0810854	0.0264286	no	0.0317143	no	GG	0.615	0.951	0.963	0.845	0.78(0.654;0.931)	0.00585843	0.00928571	yes	0.0111429	yes	AG/GG	0.915	0.902	1.064	1.121	0.973(0.858;1.103)	0.672329	0.0432143	no	0.0518571	no
0	0	251	rs1033686	RAD51L1	A/G	0.175	G	0.768	0.826	1.186	1.011	0.882(0.788;0.986)	0.0272596	0.0167857	no	0.0201429	no	GG	0.8	0.781	1.249	1.009	0.888(0.778;1.013)	0.0762707	0.0223214	no	0.0267857	no	AG/GG	0.359	0.84	1.06	1.083	0.751(0.545;1.034)	0.0792461	0.02	no	0.024	no
0	0	252	rs205499	TRIM25	A/G	0.236	G	0.779	0.957	0.956	1.096	0.899(0.808;1.001)	0.0518426	0.0225	no	0.027	no	GG	0.699	0.955	0.948	1.098	0.86(0.756;0.977)	0.0202515	0.0158929	no	0.0190714	no	AG/GG	0.988	0.911	0.95	1.162	0.992(0.743;1.324)	0.957625	0.0485714	no	0.0582857	no
0	0	253	rs3780223	C9orf94	A/G	0.079	G	1.091	0.84	0.737	1.454	1.016(0.864;1.195)	0.84403	0.0480357	no	0.0576429	no	GG	1.005	0.858	0.735	1.454	0.994(0.836;1.182)	0.947543	0.04875	no	0.0585	no	AG/GG	6.193	0.593	0.633	2.428	1.167(0.578;2.353)	0.666987	0.0430357	no	0.0516429	no
0	0	254	rs9894254	CARD14	A/G	0.057	G	0.576	1.328	1.206	1.1	0.919(0.754;1.12)	0.403918	0.0407143	no	0.0488571	no	GG	0.561	1.378	1.325	1.082	0.923(0.75;1.134)	0.444789	0.03875	no	0.0465	no	AG/GG	0.584	0.992	0.495	2.029	0.784(0.315;1.952)	0.601121	0.04125	no	0.0495	no
0	0	255	rs7149754	NA	A/G	0.579	G	1.162	1.176	0.871	0.804	1.03(0.943;1.125)	0.512177	0.04375	no	0.0525	no	GG	1.579	1.354	0.765	0.602	1.006(0.619;1.634)	0.980459	0.0494643	no	0.0593571	no	AG/GG	1.043	1.184	0.874	0.861	1.008(0.888;1.145)	0.896429	0.0469643	no	0.0563571	no
1	1	256	rs1868778	NA	A/G	0.878	G	0.709	1.182	1.022	0.738	0.837(0.738;0.951)	0.0062119	0.00767857	yes	0.00921429	yes	GG	0.542	1.696	1.622	0.529	0.718(0.458;1.127)	0.14997	0.0280357	no	0.0336429	no	AG/GG	0.695	1.184	0.981	0.73	0.828(0.719;0.953)	0.0087141	0.00821429	no	0.00985714	yes
1	1	257	rs4755936	SYT13	A/G	0.12	G	0.843	0.961	1.005	1.089	0.93(0.805;1.073)	0.31896	0.0382143	no	0.0458571	no	GG	0.916	0.98	1.083	1.111	0.987(0.844;1.154)	0.86841	0.0469643	no	0.0563571	no	AG/GG	0.299	0.732	0.492	0.506	0.426(0.242;0.751)	0.0032036	0.00375	yes	0.0045	yes
0	0	258	rs8069437	NA	A/G	0.197	G	1.217	1.071	1.104	0.899	1.1(0.987;1.226)	0.0859293	0.0267857	no	0.0321429	no	GG	1.158	1.097	1.186	0.881	1.087(0.956;1.235)	0.20388	0.0308929	no	0.0370714	no	AG/GG	2.279	0.978	0.864	0.87	1.333(0.954;1.86)	0.0918452	0.0216071	no	0.0259286	no
0	1	259	rs1674159	NDUFA11	A/G	0.146	G	0.712	0.967	0.924	0.983	0.845(0.741;0.964)	0.012433	0.0116071	no	0.0139286	yes	GG	0.671	0.957	0.931	1.078	0.841(0.728;0.973)	0.0196599	0.0153571	no	0.0184286	no	AG/GG	0.815	1.022	0.743	0.332	0.735(0.45;1.201)	0.219301	0.0303571	no	0.0364286	no
0	0	260	rs11601702	NA	A/G	0.697	G	0.777	1.054	0.995	1.083	0.922(0.84;1.012)	0.0876537	0.0271429	no	0.0325714	no	GG	0.788	1.024	1.128	1.411	0.973(0.799;1.185)	0.784872	0.045	no	0.054	no	AG/GG	0.708	1.086	0.939	1.015	0.877(0.776;0.992)	0.0370952	0.0144643	no	0.0173571	no
0	0	261	rs2116538	NA	A/G	0.756	G	1.31	0.732	0.938	1.291	1.117(1.001;1.246)	0.0476099	0.0217857	no	0.0261429	no	GG	1.205	0.704	1.359	2.291	1.285(0.946;1.745)	0.109047	0.0255357	no	0.0306429	no	AG/GG	1.423	0.703	0.86	1.24	1.115(0.98;1.269)	0.0985226	0.0230357	no	0.0276429	no
0	1	262	rs9554632	NA	A/G	0.891	G	1.472	1.113	1.155	0.9	1.206(1.037;1.403)	0.0149929	0.0132143	no	0.0158571	yes	GG	1.143	2.03	1.123	2.185	1.418(0.756;2.658)	0.276453	0.0330357	no	0.0396429	no	AG/GG	1.551	1.059	1.175	0.859	1.216(1.033;1.432)	0.0188699	0.0110714	no	0.0132857	no
0	0	263	rs975072	NA	A/G	0.194	G	1.233	0.897	1.029	1.113	1.088(0.98;1.208)	0.115622	0.0296429	no	0.0355714	no	GG	1.411	0.921	1.056	1.093	1.159(1.021;1.315)	0.0222616	0.0160714	no	0.0192857	no	AG/GG	0.832	0.679	0.926	1.399	0.883(0.67;1.164)	0.376437	0.035	no	0.042	no
0	0	264	rs10210870	NA	A/G	0.241	G	1.263	0.842	1.114	1.052	1.082(0.982;1.192)	0.109177	0.0289286	no	0.0347143	no	GG	1.222	0.825	1.076	1.176	1.087(0.961;1.228)	0.184157	0.0301786	no	0.0362143	no	AG/GG	1.926	0.743	1.347	0.766	1.158(0.917;1.462)	0.217506	0.03	no	0.036	no
0	1	265	rs7013313	CSMD3	A/C	0.333	C	0.796	0.961	0.906	0.993	0.884(0.804;0.972)	0.0110828	0.0103571	no	0.0124286	yes	CC	0.708	1.007	0.934	0.923	0.845(0.747;0.955)	0.00707504	0.0105357	yes	0.0126429	yes	AC/CC	0.876	0.781	0.751	1.225	0.896(0.724;1.109)	0.312153	0.0325	no	0.039	no
0	0	266	rs3817530	UBE2H	A/C	0.826	C	1.398	1.173	0.965	0.893	1.161(1.025;1.314)	0.0183815	0.015	no	0.018	no	CC	1.584	1.123	0.669	1.127	1.166(0.761;1.786)	0.480996	0.0396429	no	0.0475714	no	AC/CC	1.46	1.201	1.018	0.858	1.186(1.033;1.363)	0.0157626	0.01	no	0.012	no
0	0	267	rs7318601	PIG38	A/G	0.89	G	0.702	1.153	0.84	0.975	0.87(0.765;0.99)	0.0343148	0.0191071	no	0.0229286	no	GG	0.476	0.605	1.119	1.761	0.749(0.468;1.201)	0.230047	0.0319643	no	0.0383571	no	AG/GG	0.697	1.242	0.798	0.919	0.867(0.751;1)	0.050413	0.0171429	no	0.0205714	no
1	1	268	rs11218921	NA	A/G	0.254	G	0.84	0.893	1.057	0.879	0.891(0.805;0.985)	0.0243867	0.01625	no	0.0195	no	GG	0.9	0.932	1.166	0.955	0.954(0.843;1.08)	0.455396	0.0389286	no	0.0467143	no	AG/GG	0.502	0.655	0.81	0.523	0.59(0.457;0.762)	5.47125e-05	0.000357143	yes	0.000428571	yes
0	1	269	rs12737127	NA	A/C	0.801	C	1.271	1.144	1.231	0.907	1.148(1.029;1.281)	0.0134512	0.0119643	no	0.0143571	yes	CC	2.471	1.298	2.638	0.811	1.621(1.166;2.253)	0.00408398	0.00839286	yes	0.0100714	yes	AC/CC	1.219	1.156	1.113	0.902	1.117(0.982;1.271)	0.0923039	0.0217857	no	0.0261429	no
0	1	270	rs6580511	NA	A/G	0.558	G	0.779	0.984	1.051	0.939	0.892(0.818;0.973)	0.0101889	0.01	no	0.012	yes	GG	0.702	1.059	1.049	0.939	0.869(0.751;1.005)	0.0592145	0.0203571	no	0.0244286	no	AG/GG	0.737	0.921	1.087	0.901	0.854(0.745;0.979)	0.0237268	0.0123214	no	0.0147857	no
0	0	271	rs1411552	NA	A/C	0.124	C	0.769	0.735	1.421	0.948	0.869(0.752;1.005)	0.058104	0.0230357	no	0.0276429	no	CC	0.698	0.731	1.436	0.932	0.826(0.706;0.967)	0.0174209	0.0144643	no	0.0173571	no	AC/CC	2.068	0.491	1.619	1.051	1.385(0.77;2.489)	0.276675	0.0317857	no	0.0381429	no
0	0	272	rs10489436	H6PD	A/G	0.868	G	1.061	1.221	1.02	0.965	1.07(0.939;1.219)	0.308042	0.0373214	no	0.0447857	no	GG	0.33	1.208	0.491	1.1	0.642(0.393;1.047)	0.0758454	0.0221429	no	0.0265714	no	AG/GG	1.197	1.254	1.096	0.949	1.141(0.987;1.319)	0.0738077	0.01875	no	0.0225	no
0	0	273	rs12960908	NA	A/C	0.117	C	1.409	0.908	1.078	0.782	1.069(0.948;1.206)	0.275446	0.0371429	no	0.0445714	no	CC	1.475	0.865	1.002	0.688	1.043(0.909;1.197)	0.544914	0.04125	no	0.0495	no	AC/CC	1.43	1.071	1.905	1.581	1.382(0.953;2.006)	0.0882929	0.02125	no	0.0255	no
1	1	274	rs3803833	NA	A/C	0.875	C	0.712	0.974	0.856	0.667	0.765(0.675;0.867)	2.7247e-05	0.000535714	yes	0.000642857	yes	CC	0.474	0.769	0.714	0.27	0.475(0.312;0.722)	0.000505266	0.00321429	yes	0.00385714	yes	AC/CC	0.713	0.988	0.852	0.693	0.776(0.674;0.893)	0.000424731	0.00125	yes	0.0015	yes
1	1	275	rs6732163	BRE	A/G	0.801	G	1.283	0.868	1.153	1.068	1.121(1.001;1.255)	0.0479352	0.0219643	no	0.0263571	no	GG	0.826	0.476	1.121	0.854	0.824(0.581;1.168)	0.275989	0.0328571	no	0.0394286	no	AG/GG	1.438	0.894	1.19	1.144	1.204(1.055;1.374)	0.00596734	0.00607143	yes	0.00728571	yes
0	0	276	rs3019435	PARK2	A/C	0.925	C	0.717	1.319	1.629	1.163	1.056(0.913;1.222)	0.461446	0.0426786	no	0.0512143	no	CC	1.572	1.046	1.688	0.714	1.257(0.719;2.196)	0.421735	0.0378571	no	0.0454286	no	AC/CC	0.654	1.395	1.708	1.205	1.154(0.742;1.795)	0.524969	0.0392857	no	0.0471429	no
0	1	277	rs10890985	NA	A/G	0.854	G	1.435	0.98	1.581	0.793	1.173(1.03;1.335)	0.0159731	0.0133929	no	0.0160714	yes	GG	2.307	1.052	1.745	0.852	1.415(0.894;2.239)	0.138099	0.0271429	no	0.0325714	no	AG/GG	1.459	0.968	1.633	0.764	1.173(1.016;1.354)	0.0299475	0.01375	no	0.0165	no
0	0	278	rs2745252	NA	A/G	0.943	G	0.697	1.272	0.561	0.923	0.841(0.712;0.994)	0.0428011	0.0207143	no	0.0248571	no	GG	1.718	1.351	1.342	0.167	1.288(0.633;2.62)	0.484706	0.0398214	no	0.0477857	no	AG/GG	0.635	1.289	0.511	0.96	0.813(0.681;0.97)	0.0219037	0.0117857	no	0.0141429	no
0	0	279	rs10509271	CTNNA3	A/G	0.838	G	1.21	1.004	1.027	1	1.085(0.964;1.221)	0.175793	0.0333929	no	0.0400714	no	GG	2.832	0.928	0.596	0.466	1.102(0.732;1.66)	0.640383	0.0430357	no	0.0516429	no	AG/GG	1.138	1.013	1.125	1.088	1.095(0.957;1.252)	0.186907	0.0285714	no	0.0342857	no
1	1	280	rs793017	ERGIC1	A/G	0.865	G	1.379	1.563	1.239	0.788	1.233(1.075;1.414)	0.00277954	0.00642857	yes	0.00771429	yes	GG	0.812	1.808	1.548	0.279	0.823(0.491;1.379)	0.459044	0.0392857	no	0.0471429	no	AG/GG	1.498	1.617	1.232	0.837	1.303(1.122;1.515)	0.000547757	0.00142857	yes	0.00171429	yes

## Sheet: README
Significant.05	indicator variable = 1 if SNPs is significant (FDR < 5%) in meta-analysis of additive, dominant or recessive models
Significant.06	indicator variable = 1 if SNPs is significant (FDR < 6%) in meta-analysis of additive, dominant or recessive models
Index	Index to sort SNPs as reported in original GWAS
SNP	SNP ID
Gene	official gene name
Alleles	alleles of the SNP (top strand rule)
A.AF	A allele frequency in controls from NECS GWAS
CA.a	coded allele for additive genetic model
NECS.OR.a	OR in NECS GWAS
SICS.OR.a	OR in SICS GWAS
ELIX.OR.a	OR in ELIX GWAS
LLFS.OR.a	OR in LLFS GWAS
MetaOR.a	Meta OR and 95% CI
Pval.add	p-value
FDR.05.a	5% FDR correction (Benjiamini-Hochberg)
Sign.a.05	indicator variable = yes if SNPs p-value < FDR corrected p-value
FDR.06.a	6% FDR correction (Benjiamini-Hochberg)
Sign.a.06	indicator variable = yes if SNPs p-value < FDR corrected p-value
CA.d	coded allele for dominant genetic model (AA/AB versus BB)
NECS.OR.d	OR in NECS GWAS
SICS.OR.d	OR in SICS GWAS
ELIX.OR.d	OR in ELIX GWAS
LLFS.OR.d	OR in LLFS GWAS
MetaOR.d	Meta OR and 95% CI
Pval.dom	p-value
FDR.05.d	FDR correction (Benjiamini-Hochberg)
Sign.d	indicator variable = yes if SNPs p-value < FDR corrected p-value
FDR.06.d	6% FDR correction (Benjiamini-Hochberg)
Sign.d.06	indicator variable = yes if SNPs p-value < FDR corrected p-value
CA.r	coded allele for recessive genetic model (AA versus AB/BB)
NECS.OR.r	OR in NECS GWAS
SICS.OR.r	OR in SICS GWAS
ELIX.OR.r	OR in ELIX GWAS
LLFS.OR.r	OR in LLFS GWAS
MetaOR.r	Meta OR and 95% CI
Pval.rec	p-value
FDR.05.r	5% FDR correction (Benjiamini-Hochberg)
Sign.r.05	indicator variable = yes if SNPs p-value < FDR corrected p-value
FDR.06.r	6% FDR correction (Benjiamini-Hochberg)
Sign.r.06	indicator variable = yes if SNPs p-value < FDR corrected p-value
