# Supplementary material for: Meta-analysis of genetic variants associated with human exceptional longevity
Source: Aging (Albany NY). 2013 Aug 24;5(9):653–61. doi: 10.18632/aging.100594 (PMC3808698; doi:10.18632/aging.100594)
Supplement: Supplementary file 2 [file aging-05-653-s002.xlsx]

## Sheet: suppl.table.2
Significant.06	Row	SNP	Gene	Alleles	A.AF	CA.a	NECS.OR.a	SICS.OR.a	ELIX.OR.a	JCS.OR.a	LLFS.OR.a	MetaOR.a	Pval.add	FDR.06.a	Sign.a.06	NECS.OR.d	SICS.OR.d	ELIX.OR.d	JCS.OR.d	LLFS.OR.d	MetaOR.d	Pval.dom	FDR.06.d	Sign.d.06	NECS.OR.r	SICS.OR.r	ELIX.OR.r	JCS.OR.r	LLFS.OR.r	MetaOR.r	Pval.rec	FDR.06.r	Sign.r.06
1	4	rs1456669	NA	A/C	0.16	C	0.638	0.835	1.118	0.937	0.817	0.825(0.743;0.916)	0.000311811	0.00631579	yes	0.594	0.82	1.1	0.934	0.775	0.787(0.696;0.889)	0.000119395	0.00315789	yes	0.683	0.801	1.397	0.887	1.07	0.881(0.655;1.185)	0.402143	0.0442105	no
1	12	rs4073968	NA	A/G	0.305	G	0.727	0.972	1.066	0.915	1.03	0.88(0.798;0.972)	0.0113318	0.0189474	yes	0.651	0.957	1.092	0.915	1.039	0.844(0.746;0.954)	0.00691111	0.0189474	yes	0.738	1.021	1.05	0.915	1.048	0.901(0.709;1.144)	0.390424	0.0410526	no
1	79	rs2432143	ITGA1	A/G	0.883	G	1.362	1.44	1.026	0.932	0.968	1.14(1.007;1.29)	0.0380301	0.0347368	no	0.566	1.366	1.073	0.635	1.119	0.743(0.473;1.169)	0.198803	0.0378947	no	1.517	1.491	1.025	0.976	0.962	1.202(1.05;1.376)	0.00771921	0.0126316	yes
1	82	rs1800392	WRN	A/C	0.481	C	0.842	0.919	1.071	0.941	0.951	0.918(0.849;0.992)	0.030912	0.0315789	yes	0.948	0.946	1.255	0.941	0.957	0.978(0.87;1.1)	0.708602	0.0568421	no	0.636	0.815	0.923	0.898	0.906	0.787(0.685;0.904)	0.00070826	0.00315789	yes
1	94	rs336264	NA	A/G	0.889	G	0.773	0.647	0.955	0.999	1.008	0.875(0.787;0.972)	0.0130502	0.0221053	yes	0.233	0.531	1.548	1.07	0.777	0.872(0.65;1.17)	0.362114	0.0505263	no	0.816	0.63	0.891	0.97	1.041	0.858(0.757;0.973)	0.0165952	0.0157895	no
1	105	rs751481	NA	A/G	0.549	G	0.79	0.904	0.925	0.975	0.976	0.892(0.826;0.964)	0.00370152	0.0157895	yes	0.651	0.802	1.017	0.917	0.996	0.822(0.722;0.935)	0.00295045	0.0157895	yes	0.815	0.936	0.824	1.022	0.947	0.896(0.793;1.013)	0.0798757	0.0252632	no
0	112	rs12634249	SUMF1	A/C	0.214	C	1.177	0.922	1.103	1.019	1.143	1.082(0.985;1.188)	0.0989233	0.0410526	no	1.071	0.858	1.189	1.169	1.164	1.057(0.935;1.195)	0.378149	0.0536842	no	2.089	1.235	0.903	0.998	1.198	1.182(0.983;1.42)	0.0751972	0.0221053	no
1	118	rs1525501	NA	A/G	0.128	G	0.761	0.836	0.51	0.949	0.719	0.807(0.725;0.898)	8.96768e-05	0.00315789	yes	0.802	0.839	0.457	1.099	0.714	0.81(0.711;0.922)	0.00150269	0.0126316	yes	0.227	0.593	0.743	0.755	0.425	0.667(0.512;0.869)	0.00272094	0.00947368	yes
0	124	rs3804474	FLJ33708	A/G	0.473	G	1.217	0.895	1.179	0.859	0.907	1.018(0.942;1.1)	0.659779	0.0568421	no	1.508	0.806	1.391	0.893	0.935	1.128(0.99;1.284)	0.0698064	0.0347368	no	1.115	0.908	1.121	0.746	0.817	0.936(0.828;1.059)	0.295418	0.0378947	no
0	137	rs10863373	NA	A/C	0.839	C	0.995	0.823	0.856	0.947	1.266	0.966(0.878;1.062)	0.470968	0.0536842	no	2.893	1.291	0.893	0.883	2.372	1.103(0.895;1.359)	0.356886	0.0473684	no	0.879	0.727	0.825	1	1.233	0.91(0.806;1.027)	0.125327	0.0315789	no
1	149	rs3181360	TNFSF8	A/G	0.073	G	0.6	1.018	0.712	1.063	1.02	0.894(0.782;1.021)	0.0990089	0.0442105	no	0.59	1.049	0.693	0.975	0.994	0.79(0.66;0.946)	0.010437	0.0252632	yes	0.5	0.742	0.744	1.098	1.478	1.05(0.833;1.322)	0.680485	0.0473684	no
1	151	rs7207422	ACCN1	A/G	0.72	G	1.342	1.098	0.922	1.012	0.97	1.102(1.012;1.2)	0.0260019	0.0284211	yes	1.771	1.268	1.089	1.077	0.977	1.218(1.016;1.459)	0.0327495	0.0315789	no	1.367	1.072	0.861	0.964	0.958	1.095(0.979;1.226)	0.112502	0.0284211	no
1	168	rs11954180	SLC6A7	A/G	0.058	G	1.54	1.214	1.401	0.915	1.022	1.302(1.105;1.535)	0.00163927	0.0126316	yes	1.639	1.257	1.512	0.915	1.035	1.36(1.141;1.62)	0.000587908	0.00947368	yes	1.002	0.931	0.746	0.915	0.684	0.889(0.472;1.674)	0.715077	0.0505263	no
0	201	rs12341685	TMEM2	A/G	0.91	G	0.994	1.13	1.076	0.927	1.162	1.026(0.905;1.163)	0.688752	0.06	no	5.41	1.558	1.799	0.869	4.495	1.014(0.786;1.308)	0.917159	0.06	no	0.9	1.112	1.044	1.175	1.111	1.02(0.874;1.191)	0.798448	0.0568421	no
0	212	rs346119	NA	A/G	0.47	G	0.802	1.004	1.082	1.03	0.872	0.921(0.852;0.996)	0.0397302	0.0378947	no	0.823	1.078	1.087	1.002	0.83	0.933(0.831;1.048)	0.242883	0.0410526	no	0.646	0.925	1.145	1.141	0.846	0.848(0.734;0.98)	0.0251695	0.0189474	no
1	216	rs2596230	RYR3	A/G	0.876	G	1.207	0.931	1.359	1.284	0.909	1.098(0.96;1.256)	0.172939	0.0473684	no	4.175	2.755	3.099	1.099	0.893	2.607(1.536;4.423)	0.000382621	0.00631579	yes	1.135	0.805	1.278	1.377	0.899	1.023(0.883;1.186)	0.763028	0.0536842	no
1	218	rs4729049	CDK6	A/G	0.889	G	1.357	1.17	1.132	1.201	1.085	1.212(1.078;1.362)	0.00131144	0.00947368	yes	4.645	1.551	1.152	0.759	1.911	1.268(0.843;1.909)	0.254761	0.0442105	no	1.292	1.163	1.143	1.356	1.051	1.232(1.081;1.405)	0.00182853	0.00631579	yes
1	239	rs9324976	NA	A/C	0.808	C	1.16	0.884	1.276	1.095	0.863	1.046(0.934;1.172)	0.438291	0.0505263	no	2.415	0.88	1.495	1.095	1.289	1.572(1.117;2.212)	0.00949068	0.0221053	yes	1.07	0.868	1.305	1.095	0.775	0.988(0.866;1.128)	0.861274	0.06	no
1	265	rs7013313	CSMD3	A/C	0.333	C	0.796	0.961	0.906	1.072	0.993	0.894(0.815;0.981)	0.0175117	0.0252632	yes	0.708	1.007	0.934	1.225	0.923	0.871(0.774;0.98)	0.0212937	0.0284211	yes	0.876	0.781	0.751	0.332	1.225	0.874(0.708;1.079)	0.209874	0.0347368	no

## Sheet: README
Significant.06	indicator variable = 1 if SNPs is significant (FDR < 6%) in meta-analysis of additive, dominant or recessive models
Index	Index to sort SNPs as reported in original GWAS
SNP	SNP ID
Gene	official gene name
Alleles	alleles of the SNP (top strand rule)
A.AF	A allele frequency in controls from NECS GWAS
CA.a	coded allele for additive genetic model
NECS.OR.a	OR in NECS GWAS
SICS.OR.a	OR in SICS GWAS
ELIX.OR.a	OR in ELIX GWAS
LLFS.OR.a	OR in LLFS GWAS
MetaOR.a	Meta OR and 95% CI
Pval.add	p-value
FDR.06.a	6% FDR correction (Benjiamini-Hochberg)
Sign.a.06	indicator variable = yes if SNPs p-value < FDR corrected p-value
CA.d	coded allele for dominant genetic model (AA/AB versus BB)
NECS.OR.d	OR in NECS GWAS
SICS.OR.d	OR in SICS GWAS
ELIX.OR.d	OR in ELIX GWAS
LLFS.OR.d	OR in LLFS GWAS
MetaOR.d	Meta OR and 95% CI
Pval.dom	p-value
FDR.06.d	6% FDR correction (Benjiamini-Hochberg)
Sign.d.06	indicator variable = yes if SNPs p-value < FDR corrected p-value
CA.r	coded allele for recessive genetic model (AA versus AB/BB)
NECS.OR.r	OR in NECS GWAS
SICS.OR.r	OR in SICS GWAS
ELIX.OR.r	OR in ELIX GWAS
LLFS.OR.r	OR in LLFS GWAS
MetaOR.r	Meta OR and 95% CI
Pval.rec	p-value
FDR.06.r	6% FDR correction (Benjiamini-Hochberg)
Sign.r.06	indicator variable = yes if SNPs p-value < FDR corrected p-value
